# Supplementary material for: Albumin/Thiacalix[4]arene Nanoparticles as Potential Therapeutic Systems: Role of the Macrocycle for Stabilization of Monomeric Protein and Self-Assembly with Ciprofloxacin
Source: MDPI journal article supplement (doi:10.3390/ijms231710040), 2022-09-02
Supplement: s1 [file s1]

# **Albumin/thiacalix[4]arene nanoparticles as potential therapeutic systems: role of the macrocycle for stabilization of monomeric protein and self-assembly with ciprofloxacin**

Luidmila Yakimova <sup>1,\*</sup>, Aisylu Kunafina <sup>1</sup>, Olga Mostovaya <sup>1</sup>, Pavel Padnya <sup>1</sup>, Timur Mukhametzyanov <sup>1</sup>, Alexandra Voloshina <sup>2</sup>, Konstantin Petrov <sup>2</sup>, Artur Boldyrev <sup>1</sup>, and Ivan Stoikov <sup>1,\*</sup>

<sup>1</sup>A.M. Butlerov Chemical Institute, Kazan Federal University, 420008 Kazan, Kremlevskaya 18, Russian Federation

<sup>2</sup>Arbuzov Institute of Organic and Physical Chemistry, FRC Kazan Scientific Center of RAS, Arbuzov str. 8, Kazan, 420088, Russian Federation

e-mail: mila.yakimova@mail.ru, ivan.stoikov@mail.ru

## **Electronic Supplementary Information (42 pages)**

1. NMR, ESI, IR spectra of compounds **3-4**.
2. Dynamic light scattering
3. UV spectra
4. Fluorescence
5. Tables

# 1. NMR, ESI, IR spectra of compounds 3, 4

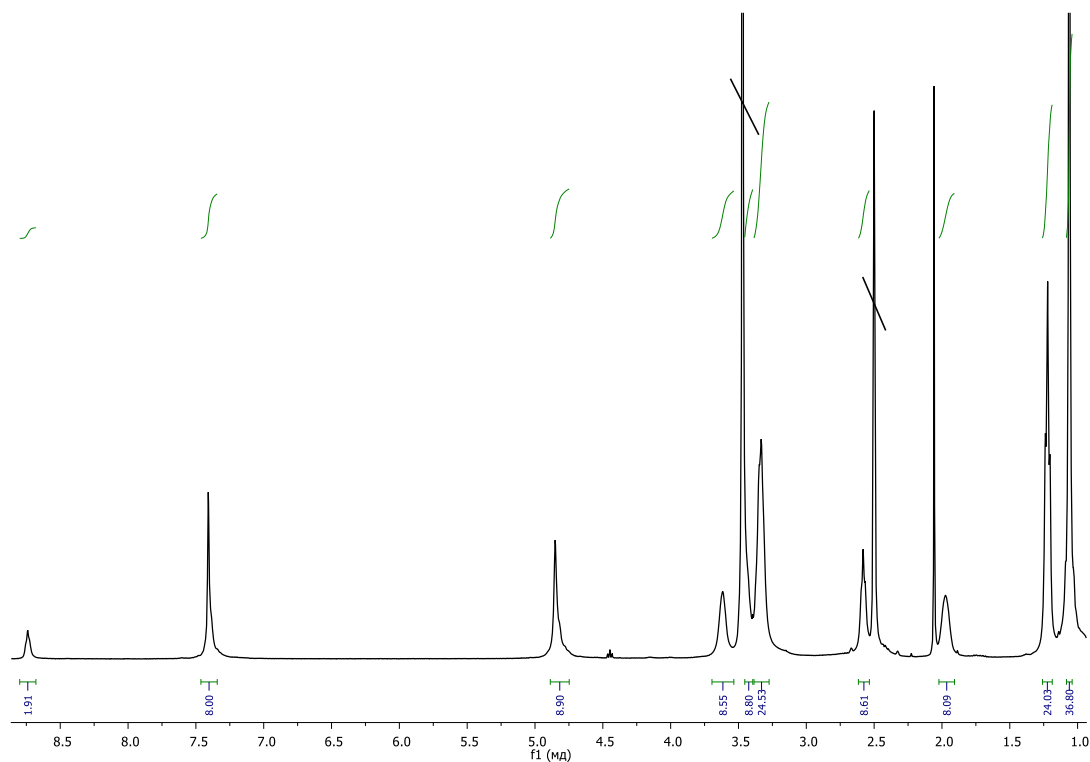

**Figure S1.** <sup>1</sup>H NMR spectrum of 5,11,17,23-Tetra-*tert*-butyl-25,26,27,28-tetrakis[(N-(3',3'-diethyl-3'-{3''-sulfonatopropyl})ammoniummethyl)-carbamoylmethoxy]-2,8,14,20-tetrathiocalix[4]arene (*cone*) (**3**), DMSO-d<sub>6</sub>, 298 K, 400 MHz.

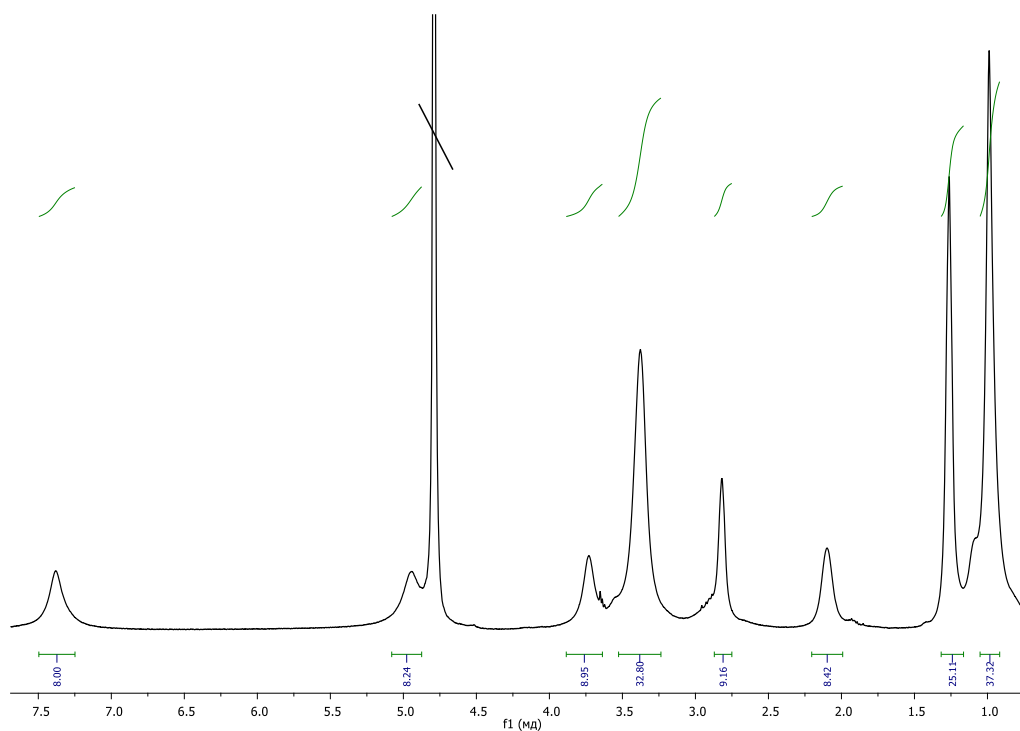

**Figure S2.** <sup>1</sup>H NMR spectrum of 5,11,17,23-Tetra-*tert*-butyl-25,26,27,28-tetrakis[(N-(3',3'-diethyl-3'-{3''-sulfonatopropyl})ammoniummethyl)-carbamoylmethoxy]-2,8,14,20-tetrathiocalix[4]arene (*cone*) (**3**), D<sub>2</sub>O, 298 K, 400 MHz.

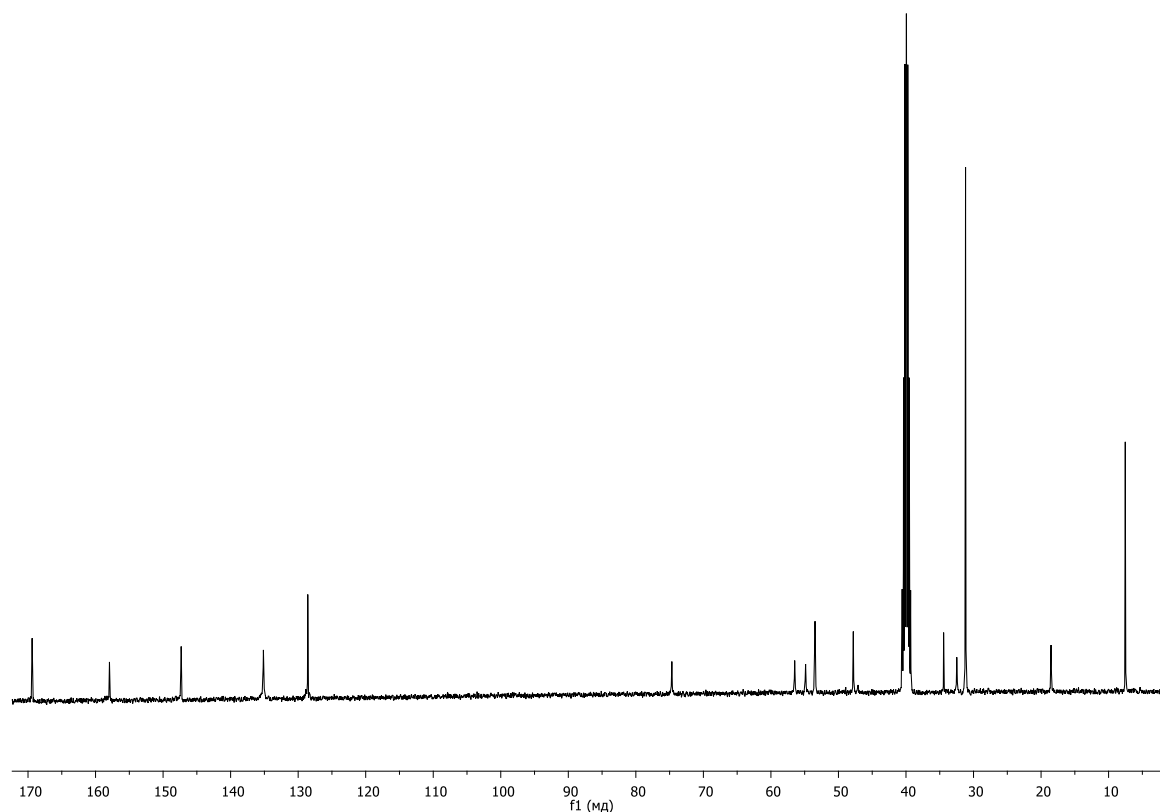

**Figure S3.**  $^{13}\text{C}$  NMR spectrum of 5,11,17,23-Tetra-*tert*-butyl-25,26,27,28-tetrakis[(N-(3',3'-diethyl-3'-{3''-sulfonatopropyl})ammoniummethyl)-carbamoylmethoxy]-2,8,14,20-tetrathiocalix[4]arene (*cone*) (**3**), DMSO- $\text{d}_6$ , 298 K, 400 MHz.

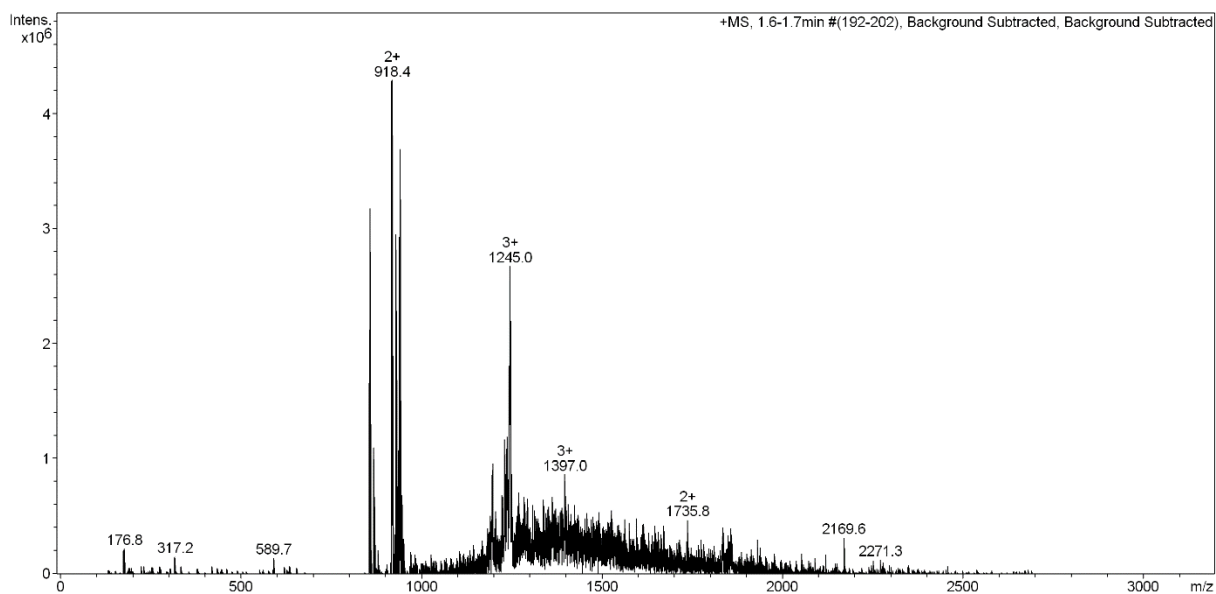

**Figure S4.** Mass spectrum (ESI) of 5,11,17,23-Tetra-*tert*-butyl-25,26,27,28-tetrakis[(N-(3',3'-diethyl-3'-{3''-sulfonatopropyl})ammoniummethyl)-carbamoylmethoxy]-2,8,14,20-tetrathiocalix[4]arene (*cone*) (**3**).

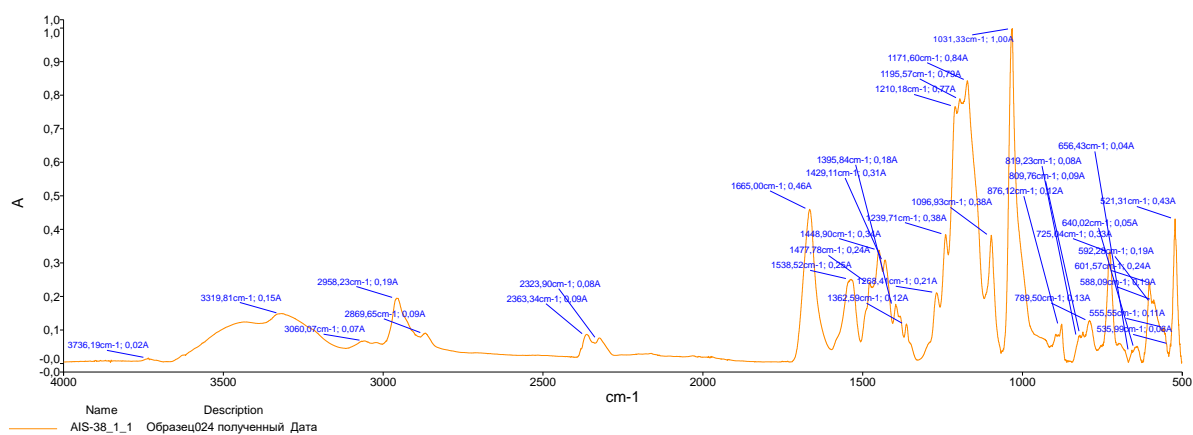

**Figure S5.** IR spectrum of 5,11,17,23-Tetra-*tert*-butyl-25,26,27,28-tetrakis[(N-(3',3'-diethyl-3'-{3''-sulfonatopropyl})ammoniummethyl)-carbamoylmethoxy]-2,8,14,20-tetrathiocalix[4]arene (*cone*) (**3**).

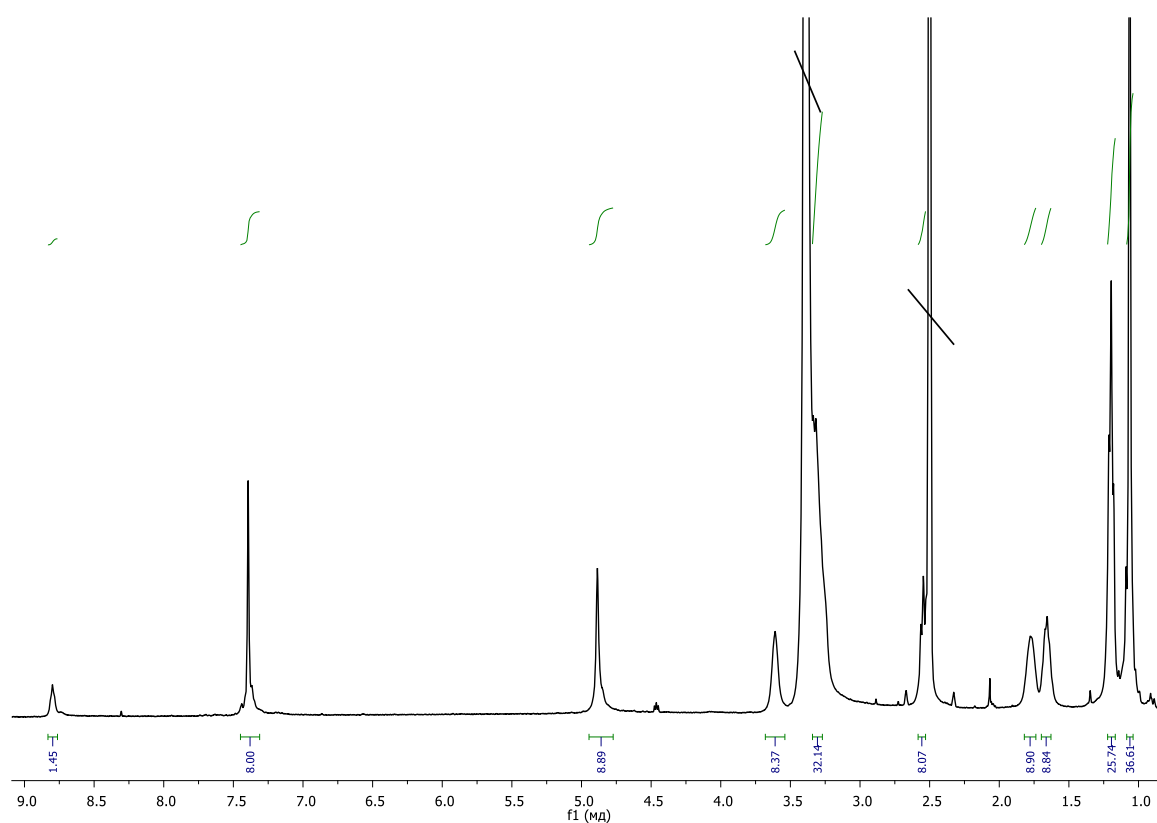

**Figure S6.** <sup>1</sup>H NMR spectrum of 5,11,17,23-Tetra-*tert*-butyl-25,26,27,28-tetrakis[(N-(3',3'-diethyl-3'-{3''-sulfonatobutyl})ammoniummethyl)-carbamoylmethoxy]-2,8,14,20-tetrathiocalix[4]arene (*cone*) (**4**), DMSO-d<sub>6</sub>, 298 K, 400 MHz.

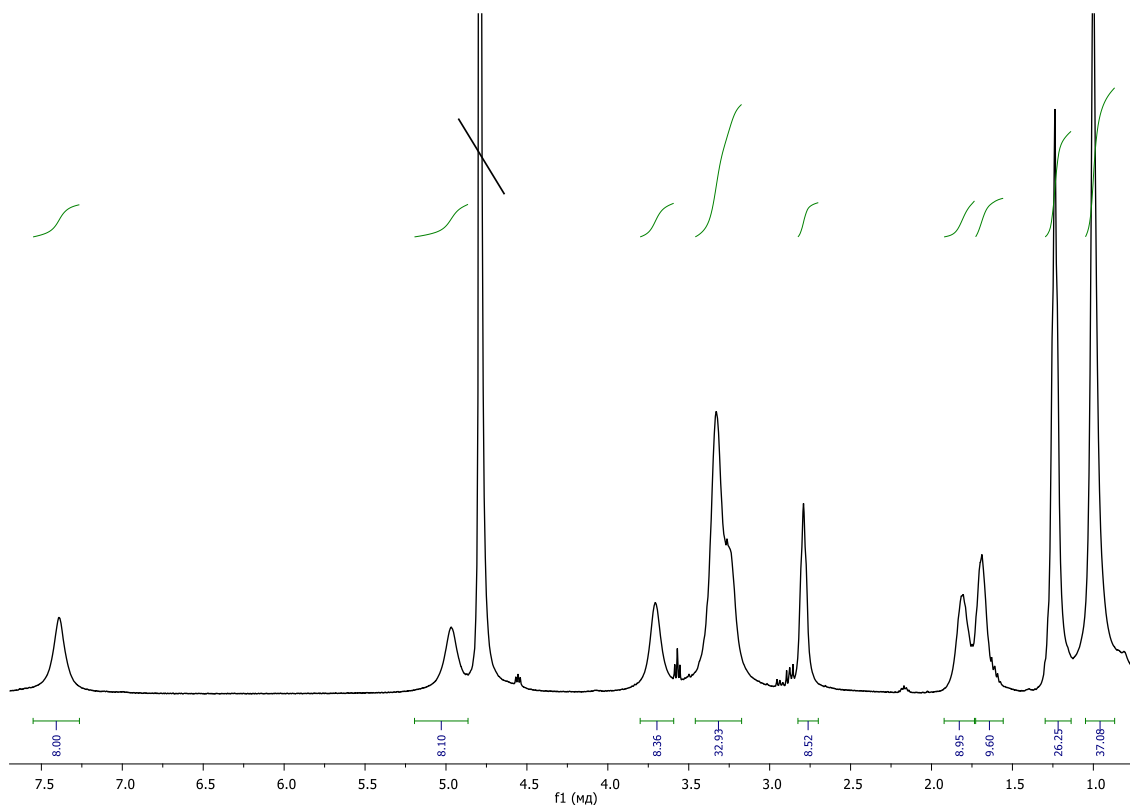

**Figure S7.**  $^1\text{H}$  NMR spectrum of 5,11,17,23-Tetra-*tert*-butyl-25,26,27,28-tetrakis[(N-(3',3'-diethyl-3'-{3''-sulfonatobutyl})ammoniummethyl)-carbamoylmethoxy]-2,8,14,20-tetrathiacalix[4]arene (*cone*) (**4**),  $\text{D}_2\text{O}$ , 298 K, 400 MHz.

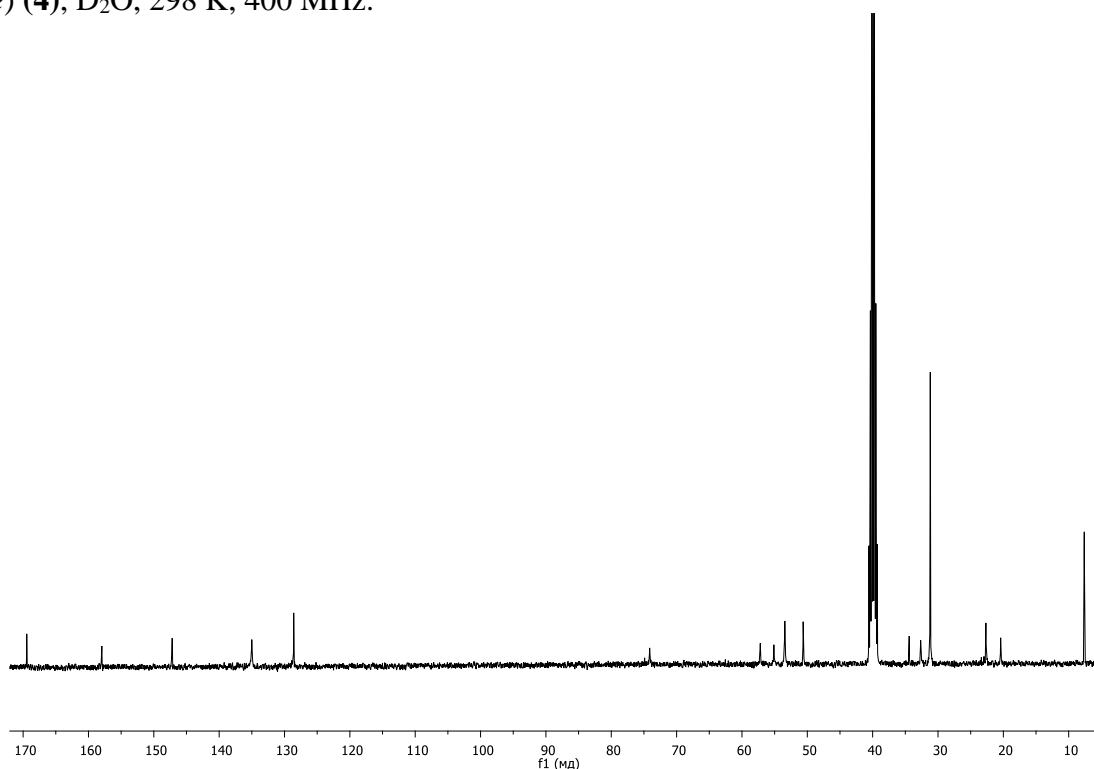

**Figure S8.**  $^{13}\text{C}$  NMR spectrum of 5,11,17,23-Tetra-*tert*-butyl-25,26,27,28-tetrakis[(N-(3',3'-diethyl-3'-{3''-sulfonatobutyl})ammoniummethyl)-carbamoylmethoxy]-2,8,14,20-tetrathiacalix[4]arene (*cone*) (**4**),  $\text{DMSO-d}_6$ , 298 K, 400 MHz.

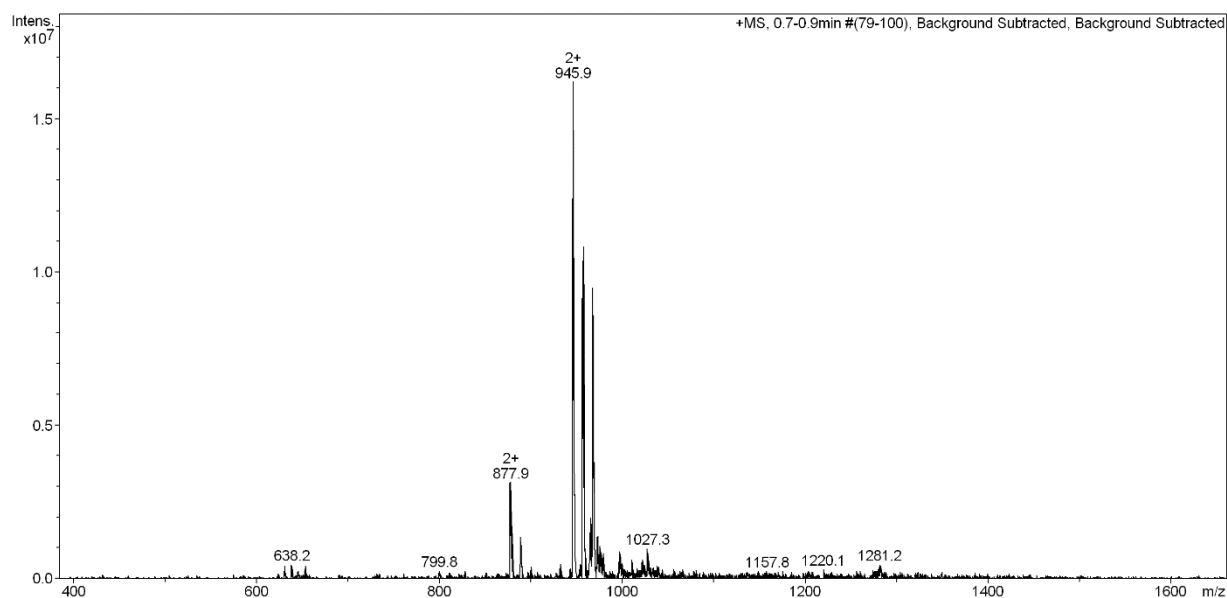

**Figure S9.** Mass spectrum (ESI) of 5,11,17,23-Tetra-*tert*-butyl-25,26,27,28-tetrakis[(N-(3',3'-diethyl-3'-{3''-sulfonatobutyl})ammoniummethyl)-carbamoylmethoxy]-2,8,14,20-tetrathiocalix[4]arene (*cone*) (**4**).

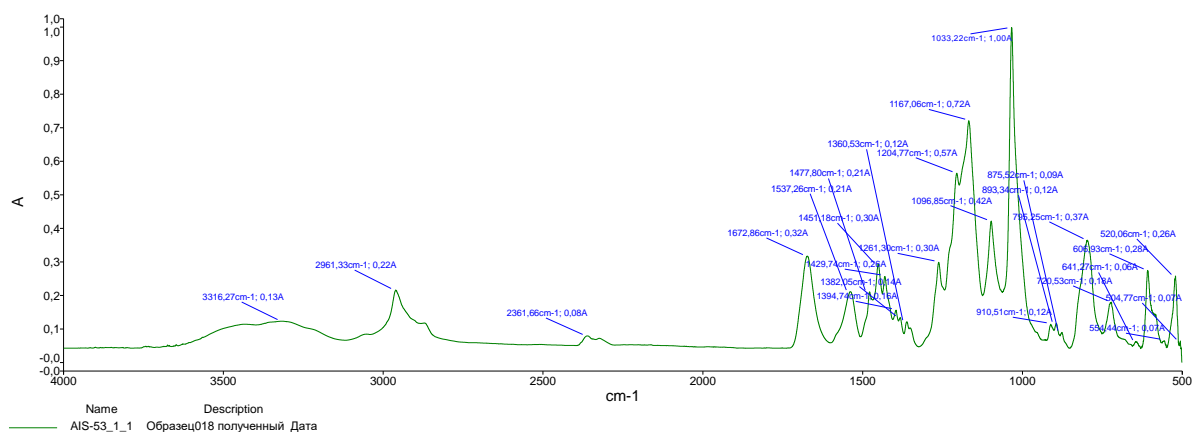

**Figure S10.** IR spectrum of 5,11,17,23-Tetra-*tert*-butyl-25,26,27,28-tetrakis[(N-(3',3'-diethyl-3'-{3''-sulfonatobutyl})ammoniummethyl)-carbamoylmethoxy]-2,8,14,20-tetrathiocalix[4]arene (*cone*) (**4**).

## 2. Dynamic light scattering

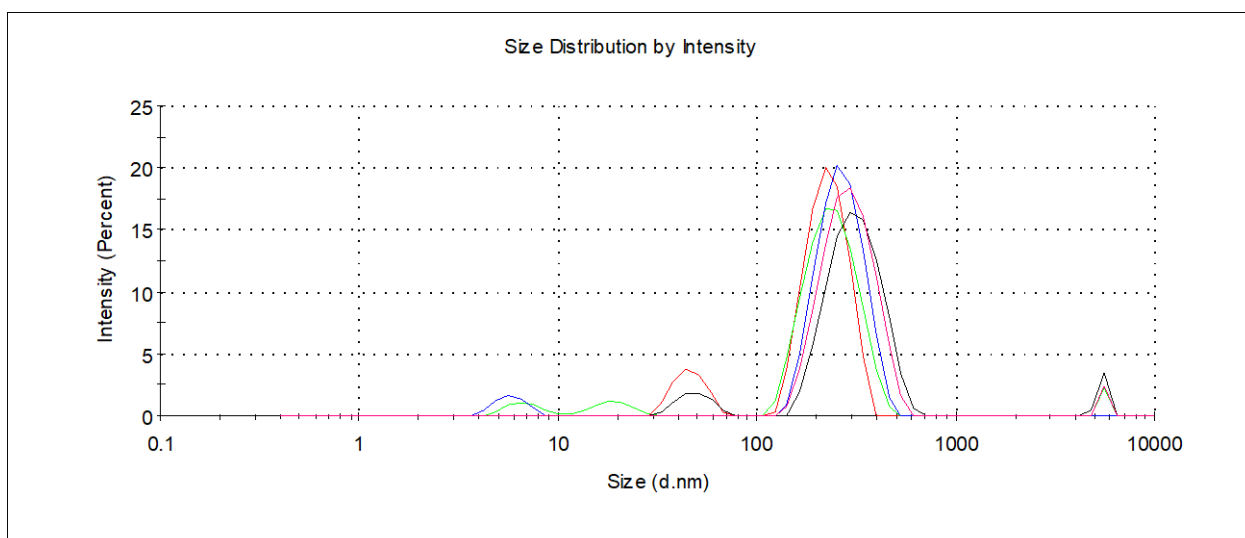

**Figure S11.** Size distribution of 5,11,17,23-tetra-tert-butyl-25,26,27,28-tetrakis[(N-(3',3'-diethyl- 3''-{3''-sulfonatopropyl})ammoniummethyl)-carbamoylmethoxy]-2,8,14,20-tetrathiocalix[4]arene (cone) (**3**) in phosphate buffer at 25°C ( $5 \times 10^{-5}$  M).

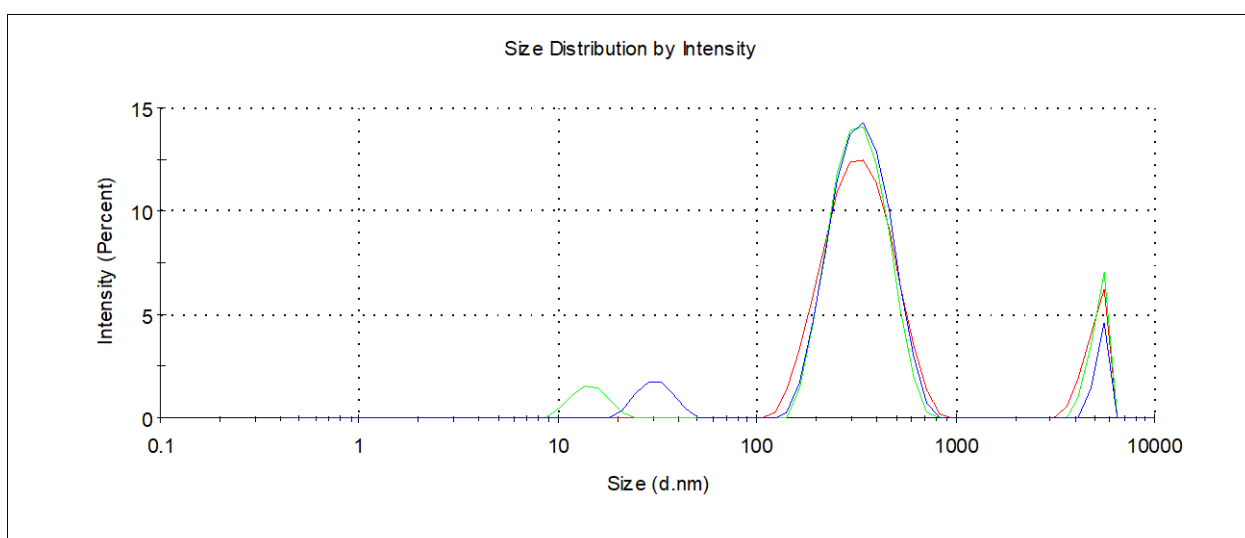

**Figure S12.** Size distribution of 5,11,17,23-tetra-tert-butyl-25,26,27,28-tetrakis[(N-(3',3'-diethyl- 3''-{3''-sulfonatopropyl})ammoniummethyl)-carbamoylmethoxy]-2,8,14,20-tetrathiocalix[4]arene (cone) (**3**) in phosphate buffer at 25°C ( $1 \times 10^{-5}$  M).

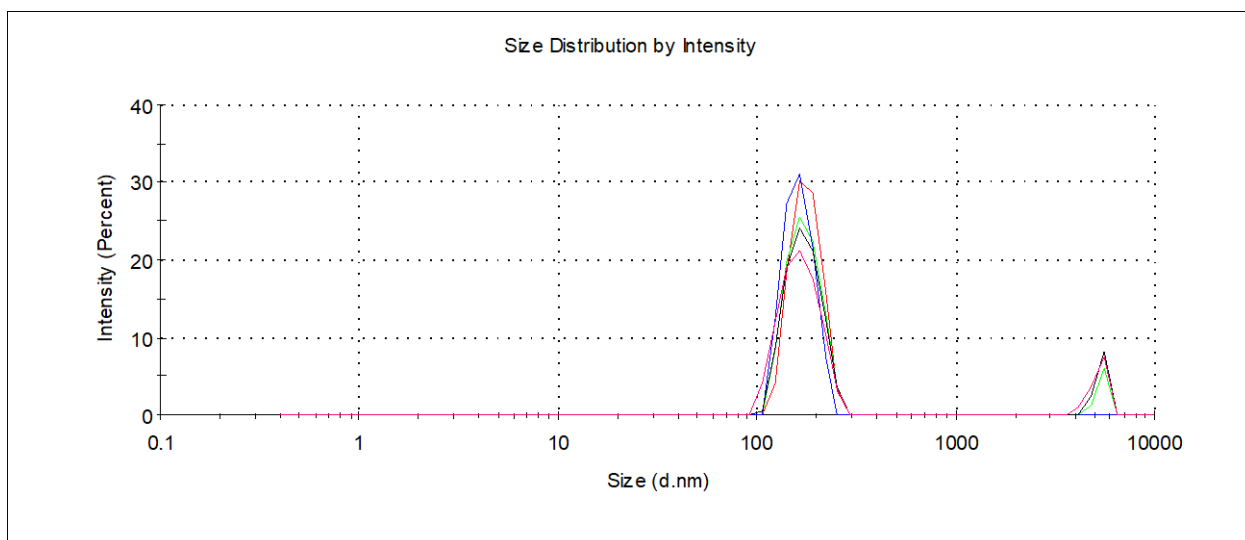

**Figure S13.** Size distribution of 5,11,17,23-tetra-tert-butyl-25,26,27,28-tetrakis[(N-(3',3'-diethyl- 3'-{3''-sulfonatopropyl})ammoniummethyl)-carbamoylmethoxy]-2,8,14,20-tetrathiacalix[4]arene (cone) (**3**) in phosphate buffer at 25°C ( $5 \times 10^{-6}$  M).

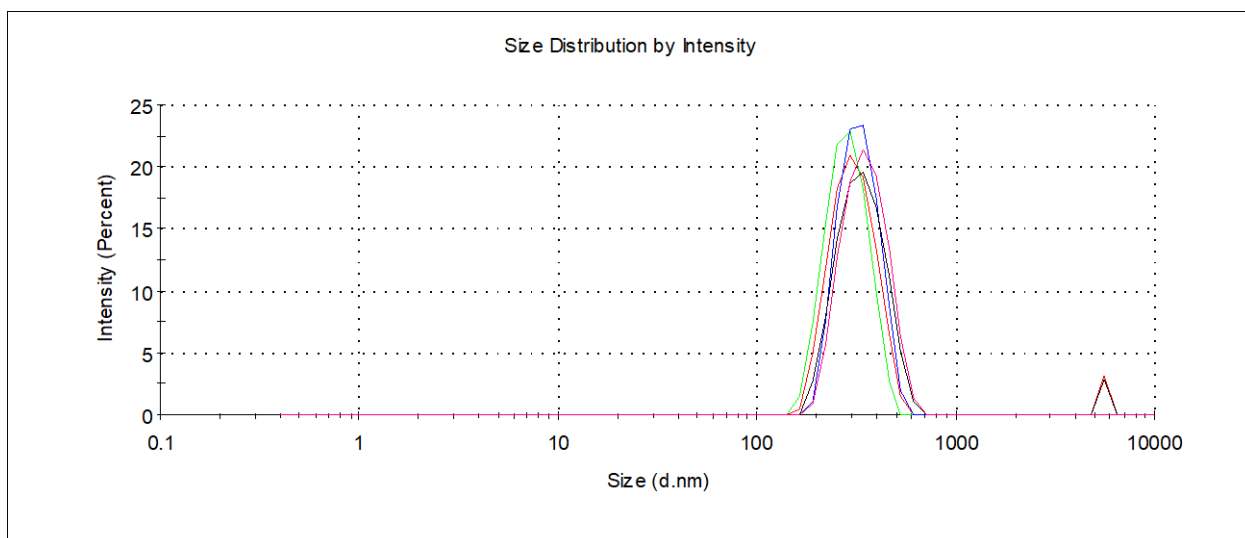

**Figure S14.** Size distribution of 5,11,17,23-tetra-tert-butyl-25,26,27,28-tetrakis[(N-(3',3'-diethyl- 3'-{3''-sulfonatopropyl})ammoniummethyl)-carbamoylmethoxy]-2,8,14,20-tetrathiacalix[4]arene (cone) (**3**) in phosphate buffer at 25°C ( $1 \times 10^{-6}$  M).



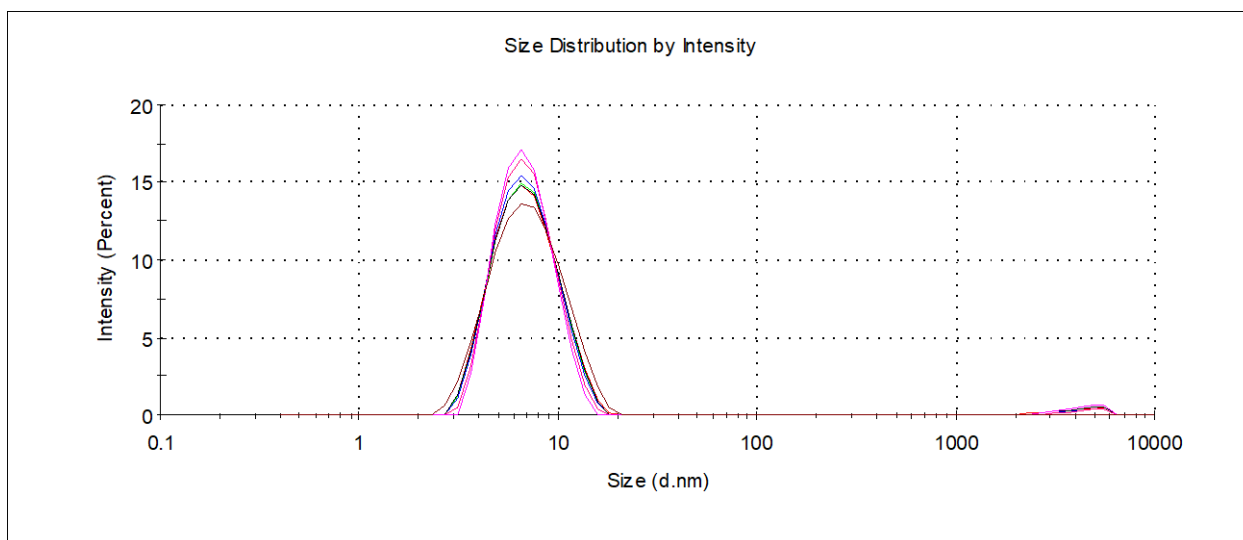

**Figure S15.** Size distribution of 5,11,17,23-tetra-tert-butyl-25,26,27,28-tetrakis[(N-(3',3'-diethyl- 3'-{3''-sulfonatopropyl})ammoniummethyl)-carbamoylmethoxy]-2,8,14,20-tetrathiocalix[4]arene (cone) (**3**) in phosphate buffer with BSA (1:1) at 25°C ( $5 \times 10^{-5}$  M).

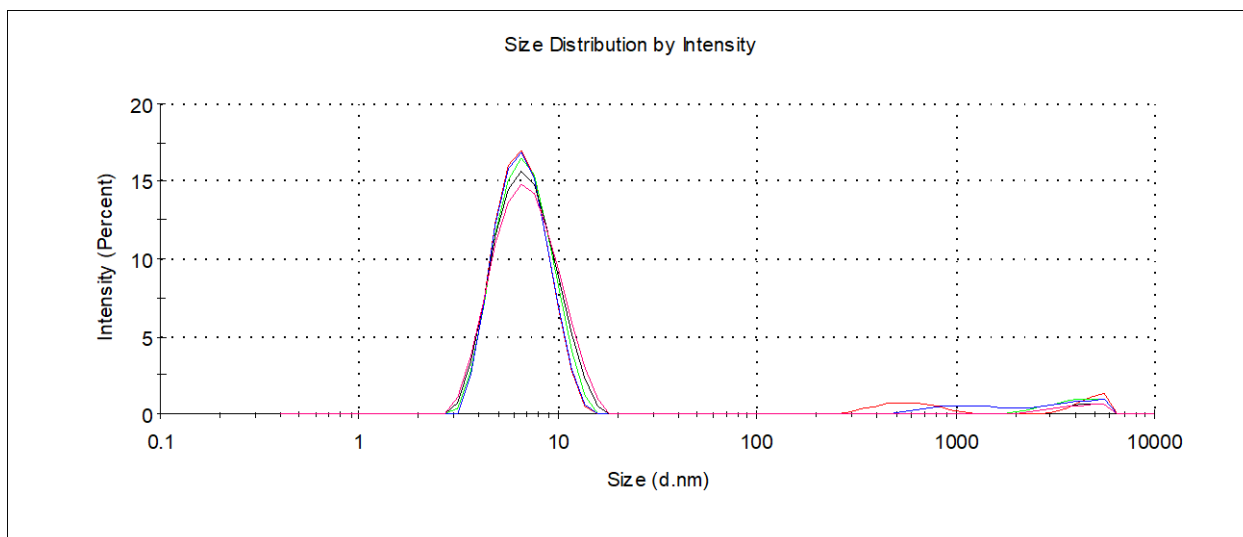

**Figure S16.** Size distribution of 5,11,17,23-tetra-tert-butyl-25,26,27,28-tetrakis[(N-(3',3'-diethyl- 3'-{3''-sulfonatopropyl})ammoniummethyl)-carbamoylmethoxy]-2,8,14,20-tetrathiocalix[4]arene (cone) (**3**) in phosphate buffer with BSA (1:1) at 25°C ( $1 \times 10^{-5}$  M).

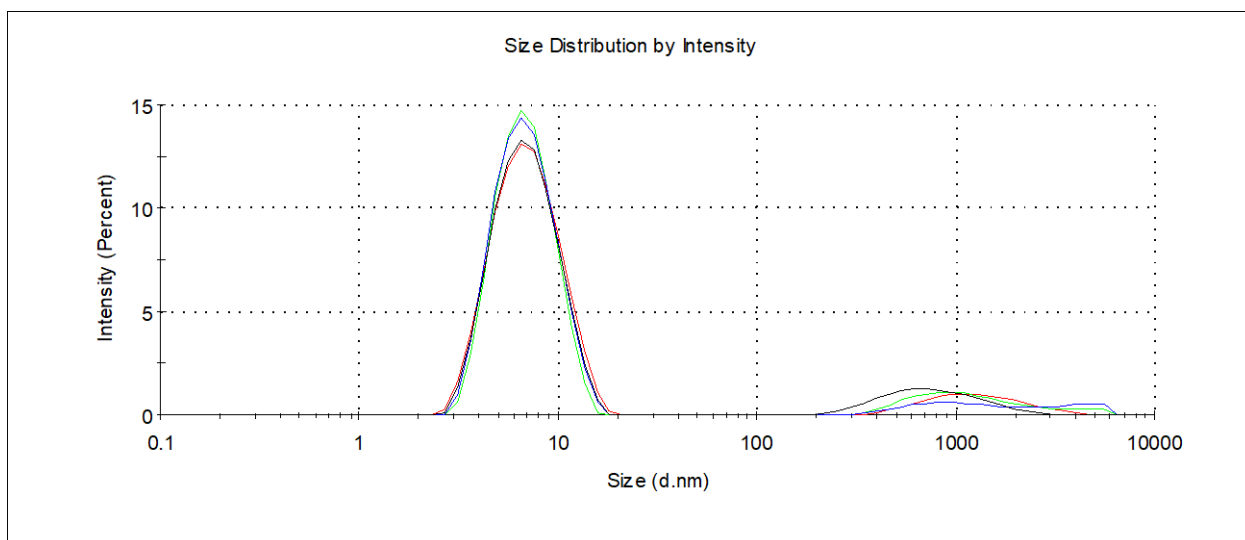

**Figure S17.** Size distribution of 5,11,17,23-tetra-tert-butyl-25,26,27,28-tetrakis[(N-(3',3'-diethyl- 3'-{3''-sulfonatopropyl})ammoniummethyl)-carbamoylmethoxy]-2,8,14,20-tetrathiacalix[4]arene (cone) (**3**) in phosphate buffer with BSA (1:1) at 25°C ( $5 \times 10^{-6}$  M).

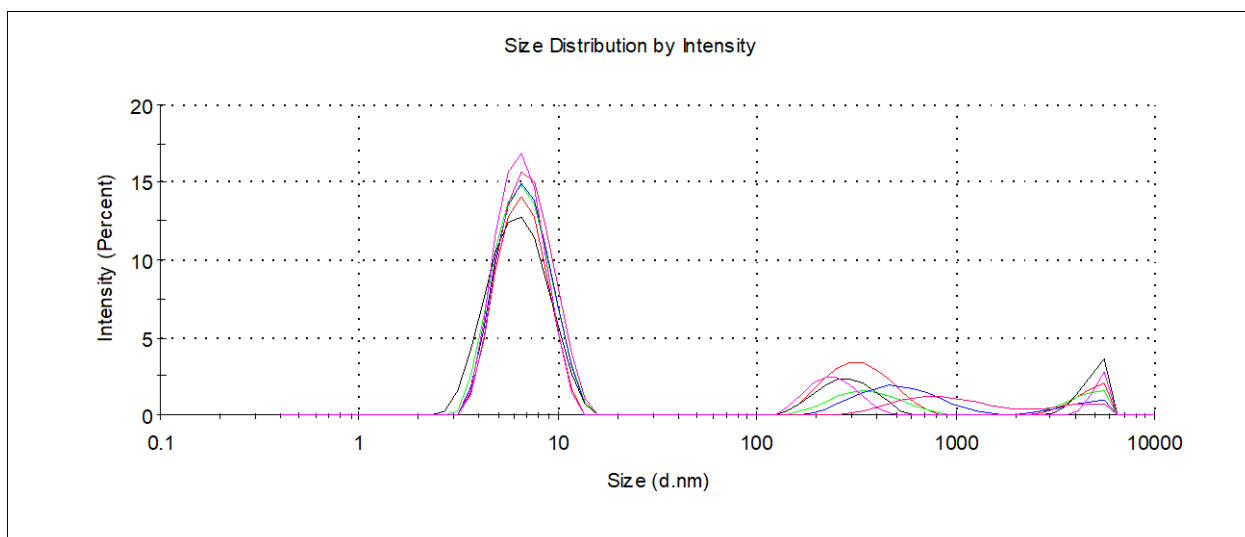

**Figure S18.** Size distribution of 5,11,17,23-tetra-tert-butyl-25,26,27,28-tetrakis[(N-(3',3'-diethyl- 3'-{3''-sulfonatopropyl})ammoniummethyl)-carbamoylmethoxy]-2,8,14,20-tetrathiacalix[4]arene (cone) (**3**) in phosphate buffer with BSA (1:1) at 25°C ( $1 \times 10^{-6}$  M).

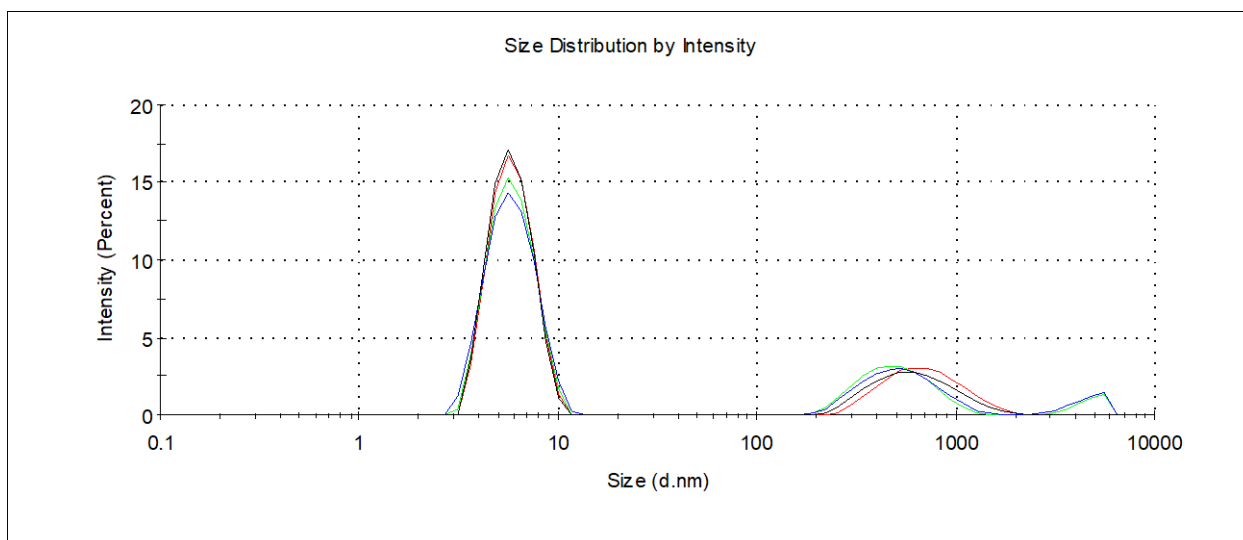

**Figure S19.** Size distribution of 5,11,17,23-tetra-tert-butyl-25,26,27,28-tetrakis[(N-(3',3'-diethyl- 3'-{3''-sulfonatopropyl})ammoniummethyl)-carbamoylmethoxy]-2,8,14,20-tetrathiacalix[4]arene (cone) (**3**) in phosphate buffer with BSA (1:10) at 25°C ( $5 \times 10^{-5}$  M/ $5 \times 10^{-4}$  M).

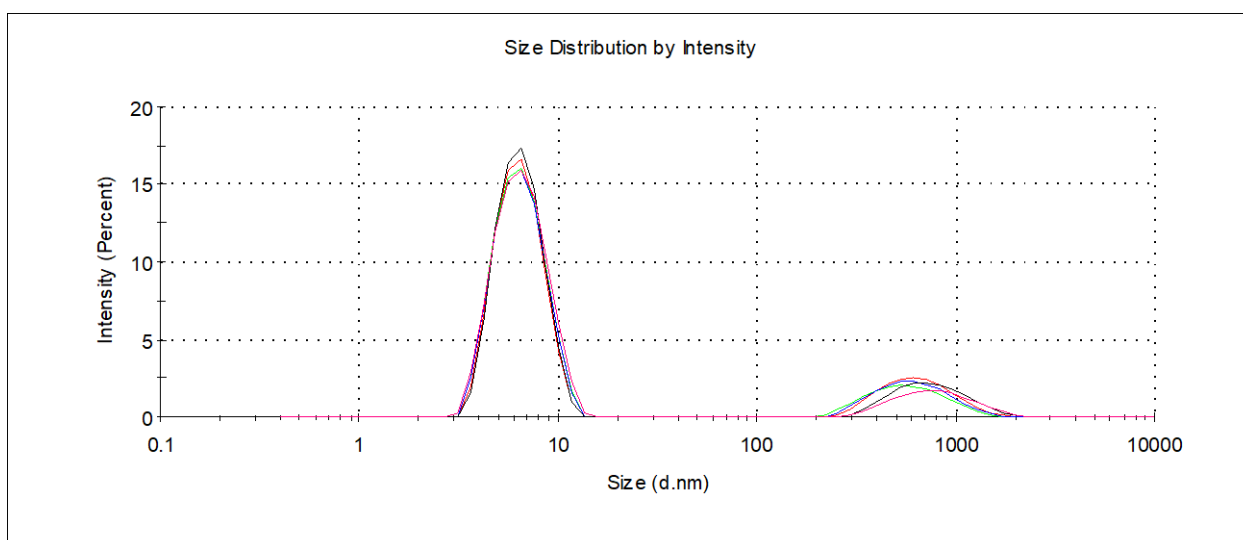

**Figure S20.** Size distribution of 5,11,17,23-tetra-tert-butyl-25,26,27,28-tetrakis[(N-(3',3'-diethyl- 3'-{3''-sulfonatopropyl})ammoniummethyl)-carbamoylmethoxy]-2,8,14,20-tetrathiacalix[4]arene (cone) (**3**) in phosphate buffer with BSA (1:10) at 25°C ( $1 \times 10^{-5}$  M/ $1 \times 10^{-4}$  M).

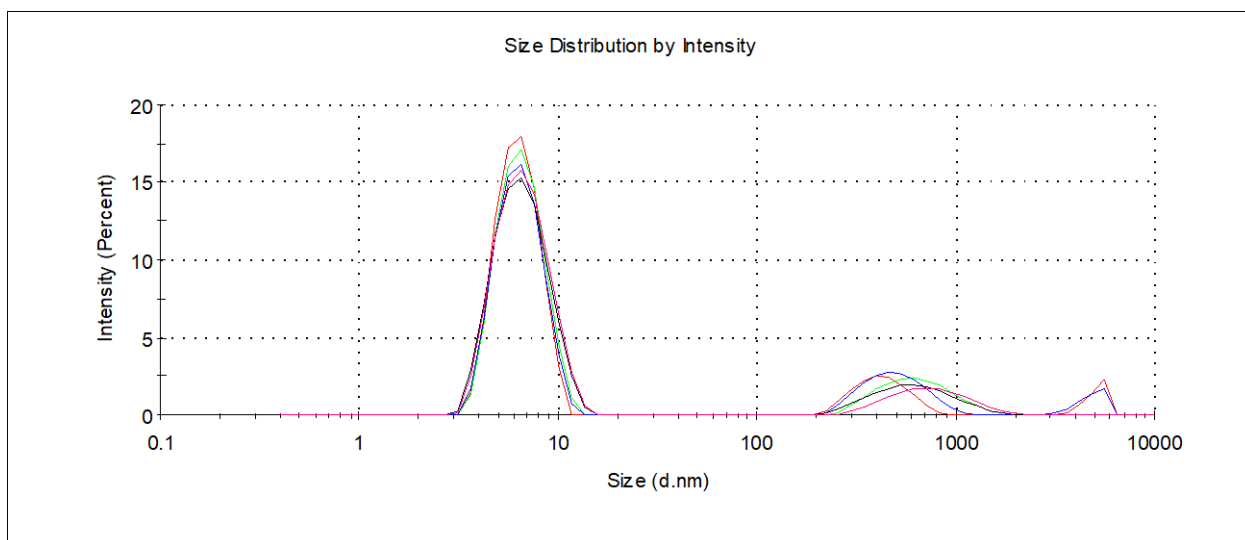

**Figure S21.** Size distribution of 5,11,17,23-tetra-tert-butyl-25,26,27,28-tetrakis[(N-(3',3'-diethyl- 3'-{3''-sulfonatopropyl})ammoniummethyl)-carbamoylmethoxy]-2,8,14,20-tetrathiacalix[4]arene (cone) (**3**) in phosphate buffer with BSA (1:10) at 25°C ( $5 \times 10^{-6}$  M/ $5 \times 10^{-5}$  M).

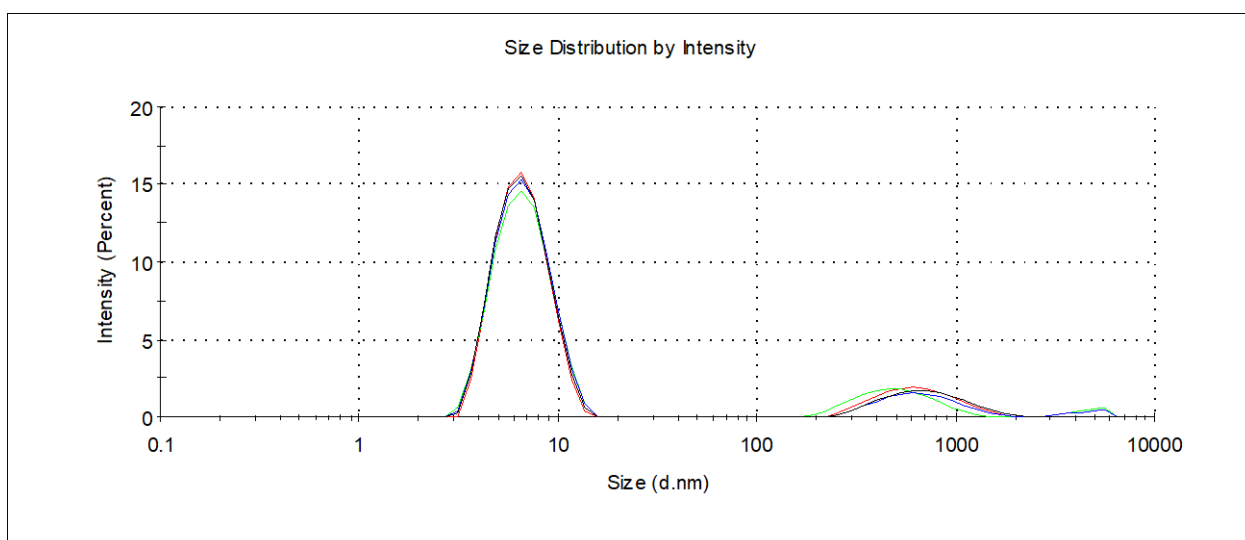

**Figure S22.** Size distribution of 5,11,17,23-tetra-tert-butyl-25,26,27,28-tetrakis[(N-(3',3'-diethyl- 3'-{3''-sulfonatopropyl})ammoniummethyl)-carbamoylmethoxy]-2,8,14,20-tetrathiacalix[4]arene (cone) (**3**) in phosphate buffer with BSA (1:10) at 25°C ( $1 \times 10^{-6}$  M/ $1 \times 10^{-5}$  M).

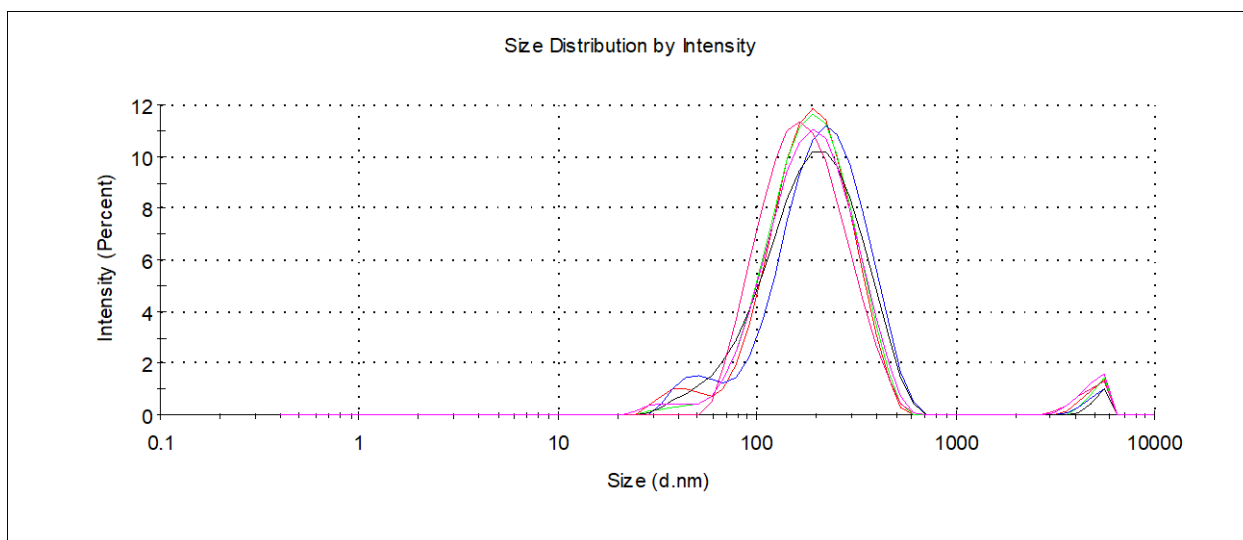

**Figure S23.** Size distribution of 5,11,17,23-tetra-tert-butyl-25,26,27,28-tetrakis[(N-(3',3'-diethyl- 3'-{3''-sulfonatopropyl})ammoniummethyl)-carbamoylmethoxy]-2,8,14,20-tetrathiacalix[4]arene (cone) (**4**) in phosphate buffer at 25°C ( $5 \times 10^{-5}$  M).

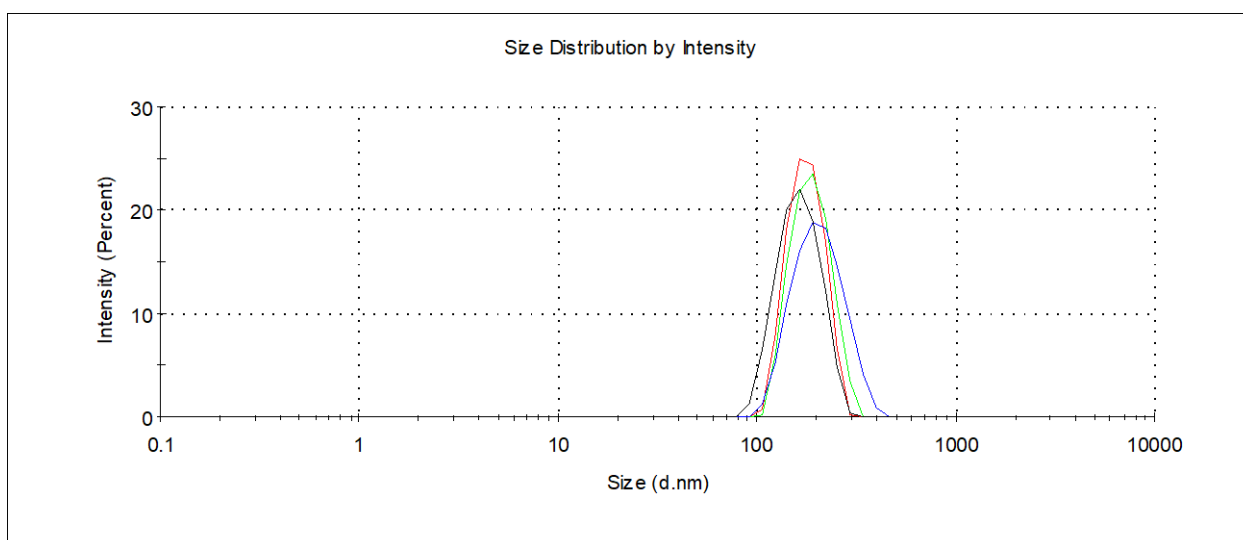

**Figure S24.** Size distribution of 5,11,17,23-tetra-tert-butyl-25,26,27,28-tetrakis[(N-(3',3'-diethyl- 3'-{3''-sulfonatopropyl})ammoniummethyl)-carbamoylmethoxy]-2,8,14,20-tetrathiacalix[4]arene (cone) (**4**) in phosphate buffer at 25°C ( $1 \times 10^{-5}$  M).

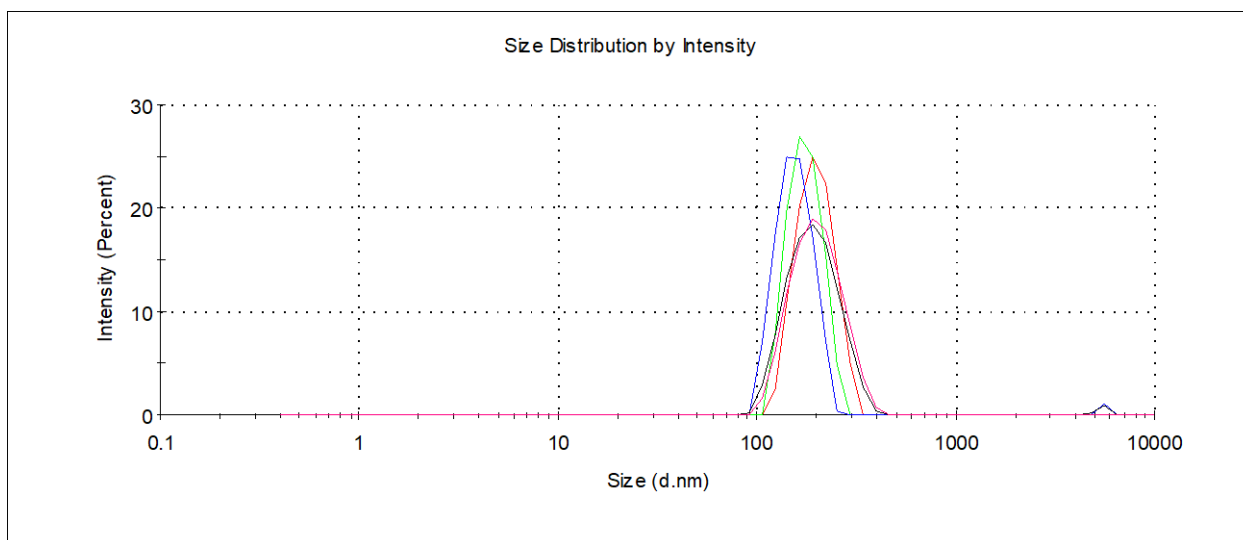

**Figure S25.** Size distribution of 5,11,17,23-tetra-tert-butyl-25,26,27,28-tetrakis[(N-(3',3'-diethyl- 3'-{3''-sulfonatopropyl})ammoniummethyl)-carbamoylmethoxy]-2,8,14,20-tetrathiocalix[4]arene (cone) (**4**) in phosphate buffer at 25°C ( $5 \times 10^{-6}$  M).

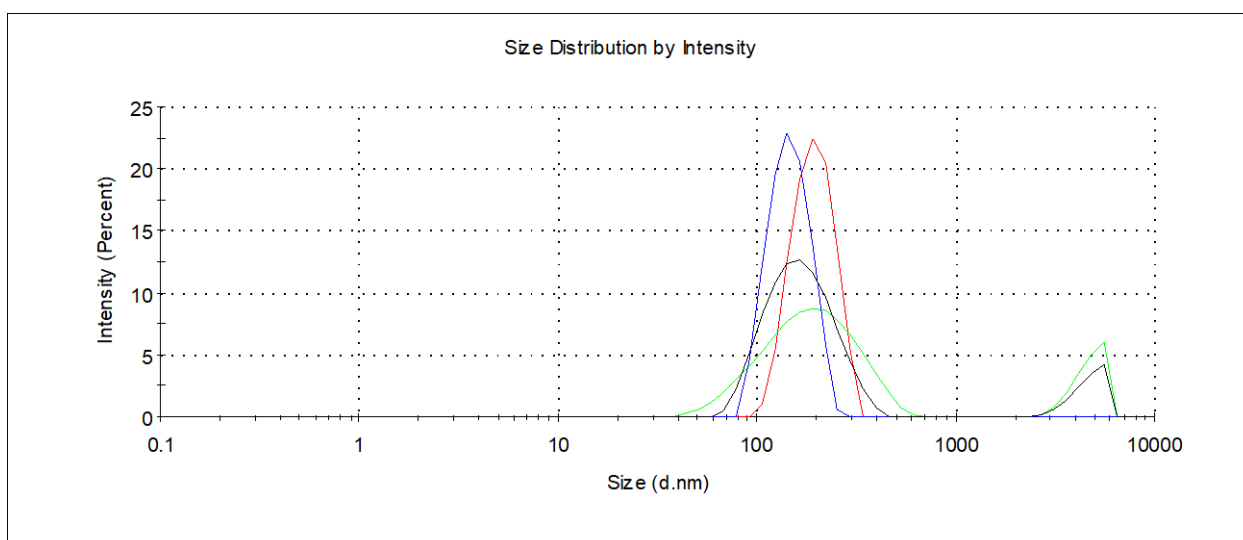

**Figure S26.** Size distribution of 5,11,17,23-tetra-tert-butyl-25,26,27,28-tetrakis[(N-(3',3'-diethyl- 3'-{3''-sulfonatopropyl})ammoniummethyl)-carbamoylmethoxy]-2,8,14,20-tetrathiocalix[4]arene (cone) (**4**) in phosphate buffer at 25°C ( $1 \times 10^{-6}$  M).

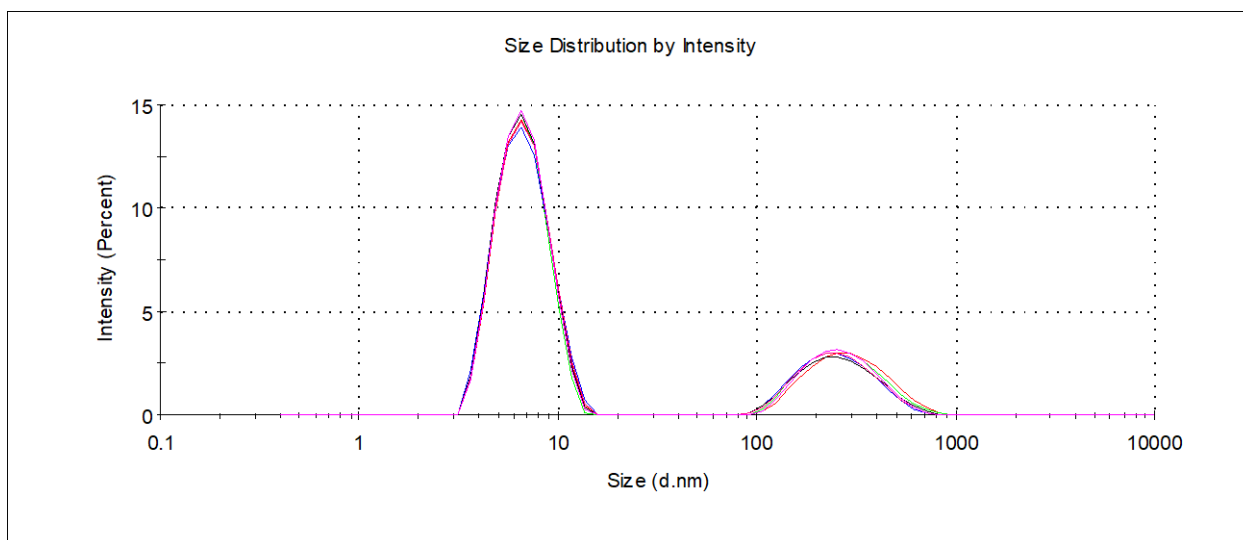

**Figure S27.** Size distribution of 5,11,17,23-tetra-tert-butyl-25,26,27,28-tetrakis[(N-(3',3'-diethyl- 3'-{3''-sulfonatopropyl})ammoniummethyl)-carbamoylmethoxy]-2,8,14,20-tetrathiacalix[4]arene (cone) (**4**) in phosphate buffer with BSA (1:1) at 25°C ( $5 \times 10^{-5}$  M).

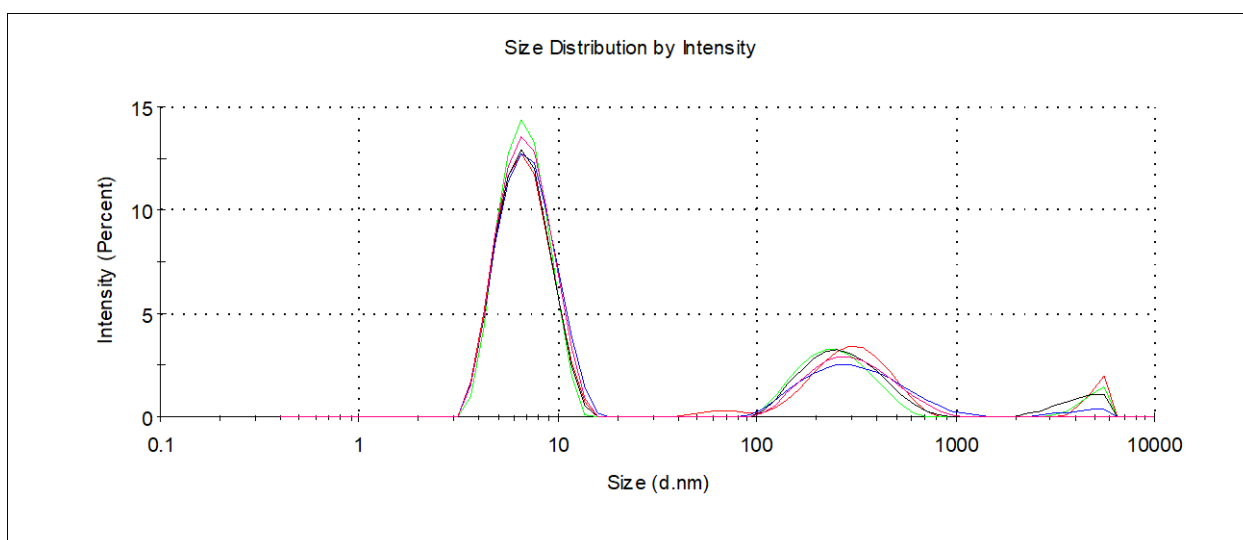

**Figure S28.** Size distribution of 5,11,17,23-tetra-tert-butyl-25,26,27,28-tetrakis[(N-(3',3'-diethyl- 3'-{3''-sulfonatopropyl})ammoniummethyl)-carbamoylmethoxy]-2,8,14,20-tetrathiacalix[4]arene (cone) (**4**) in phosphate buffer with BSA (1:1) at 25°C ( $1 \times 10^{-5}$  M).

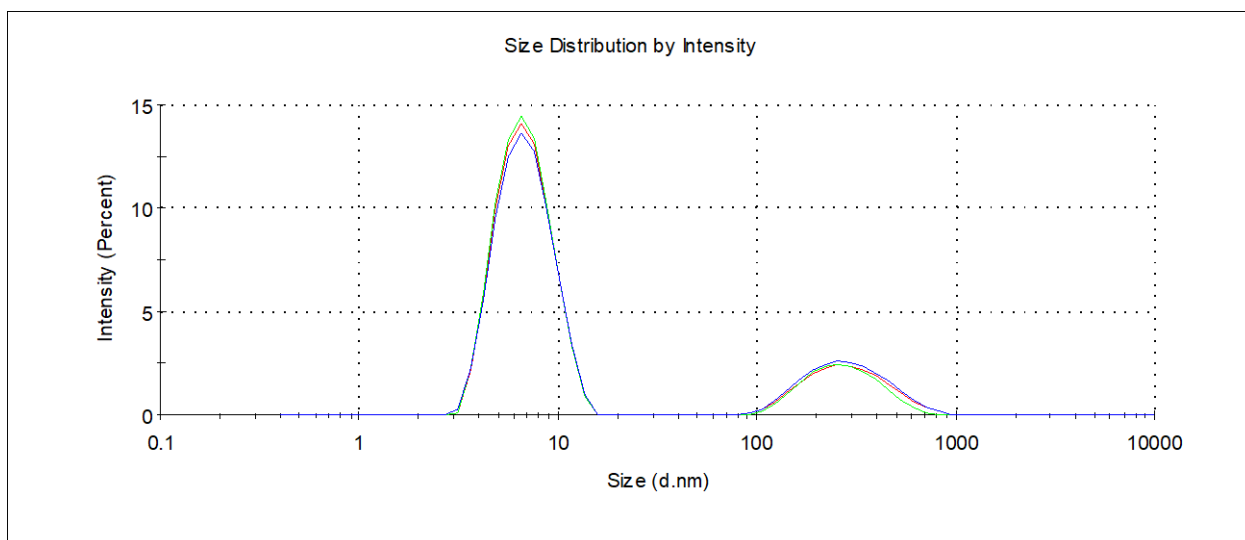

**Figure S29.** Size distribution of 5,11,17,23-tetra-tert-butyl-25,26,27,28-tetrakis[(N-(3',3'-diethyl- 3'-{3''-sulfonatopropyl})ammoniummethyl)-carbamoylmethoxy]-2,8,14,20-tetrathiacalix[4]arene (cone) (**4**) in phosphate buffer with BSA (1:1) at 25°C ( $5 \times 10^{-6}$  M).

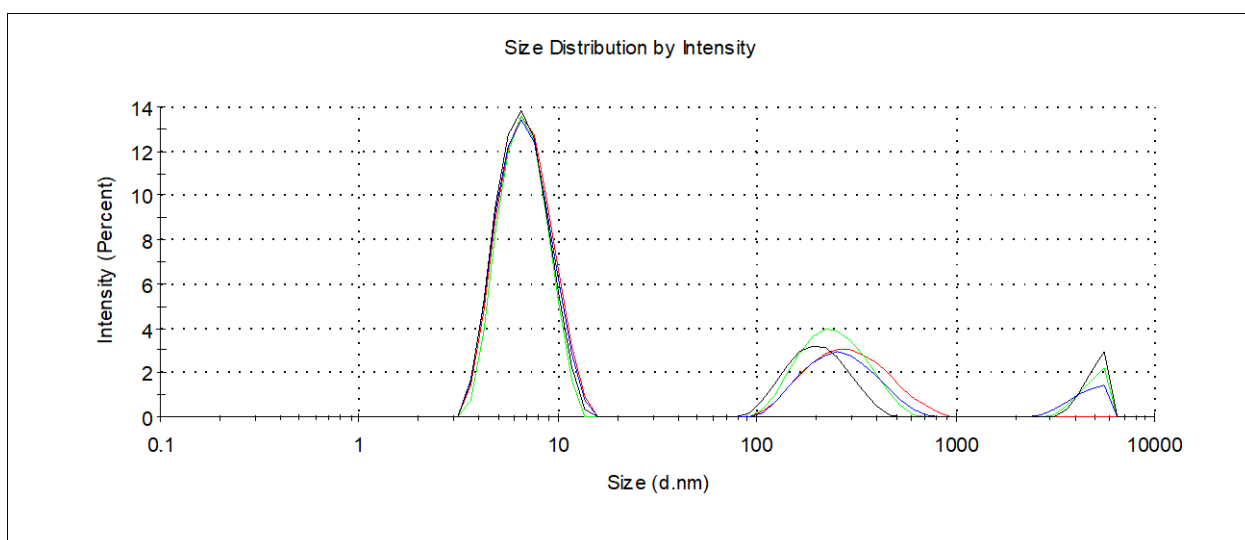

**Figure S30.** Size distribution of 5,11,17,23-tetra-tert-butyl-25,26,27,28-tetrakis[(N-(3',3'-diethyl- 3'-{3''-sulfonatopropyl})ammoniummethyl)-carbamoylmethoxy]-2,8,14,20-tetrathiacalix[4]arene (cone) (**4**) in phosphate buffer with BSA (1:1) at 25°C ( $1 \times 10^{-6}$  M).



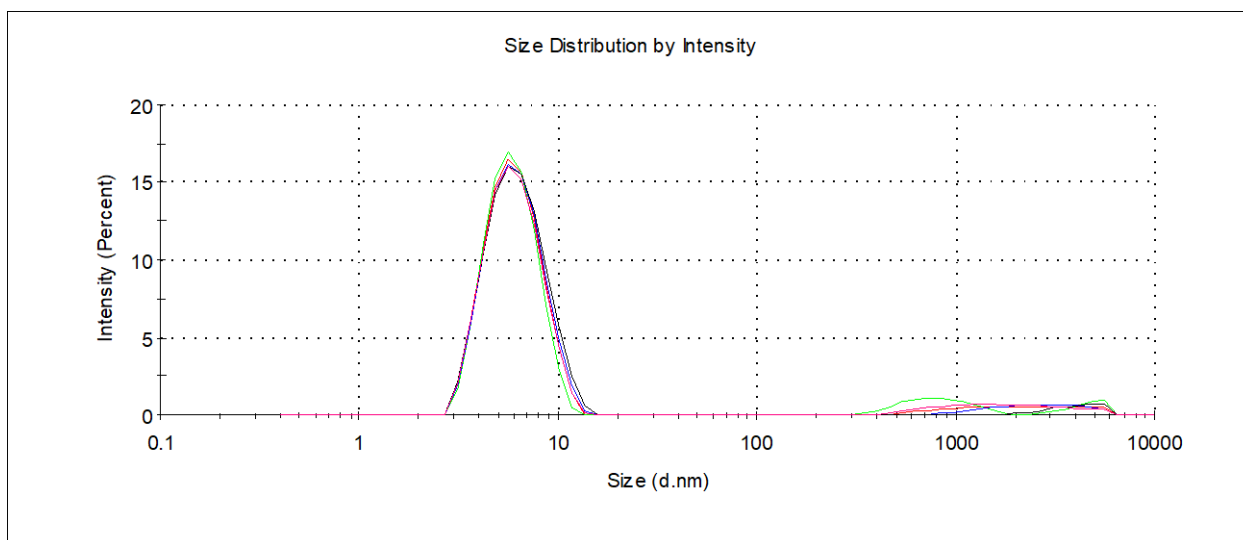

**Figure S31.** Size distribution of 5,11,17,23-tetra-tert-butyl-25,26,27,28-tetrakis[(N-(3',3'-diethyl- 3'-{3''-sulfonatopropyl})ammoniummethyl)-carbamoylmethoxy]-2,8,14,20-tetrathiacalix[4]arene (cone) (**4**) in phosphate buffer with BSA (1:10) at 25°C ( $5 \times 10^{-5}$  M/ $5 \times 10^{-4}$  M).

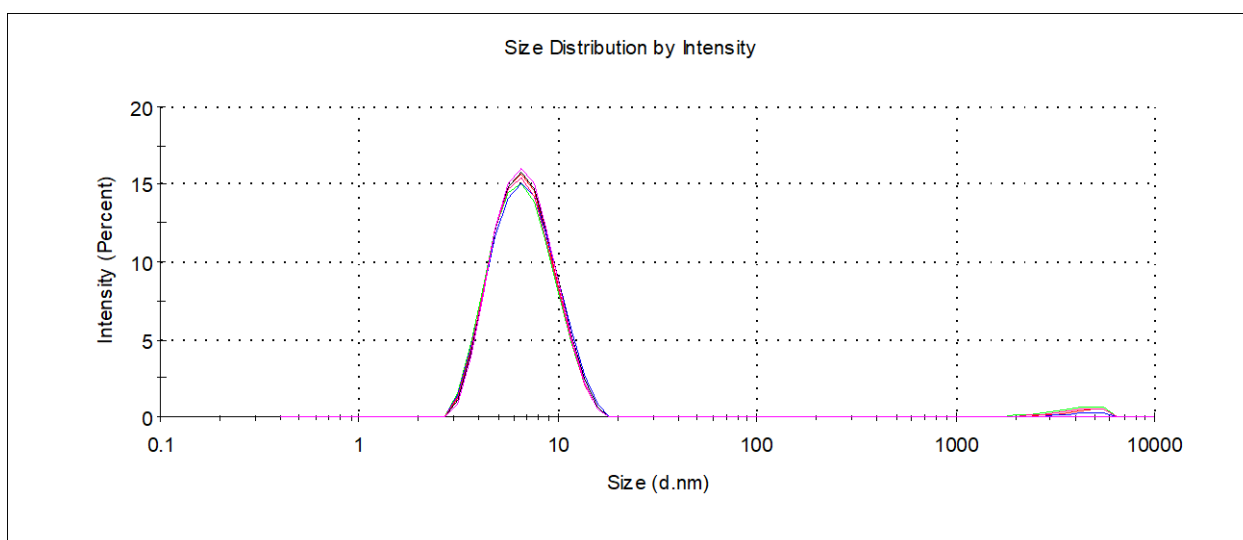

**Figure S32.** Size distribution of 5,11,17,23-tetra-tert-butyl-25,26,27,28-tetrakis[(N-(3',3'-diethyl- 3'-{3''-sulfonatopropyl})ammoniummethyl)-carbamoylmethoxy]-2,8,14,20-tetrathiacalix[4]arene (cone) (**4**) in phosphate buffer with BSA (1:10) at 25°C ( $1 \times 10^{-5}$  M/ $1 \times 10^{-4}$  M).

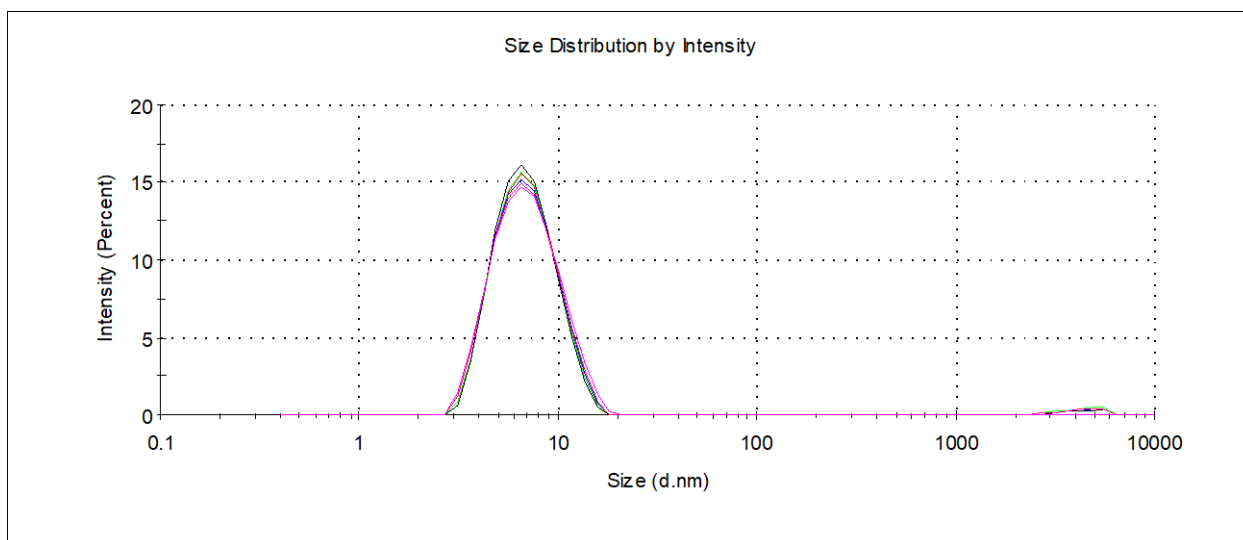

**Figure S33.** Size distribution of 5,11,17,23-tetra-tert-butyl-25,26,27,28-tetrakis[(N-(3',3'-diethyl- 3'-{3''-sulfonatopropyl})ammoniummethyl)-carbamoylmethoxy]-2,8,14,20-tetrathiacalix[4]arene (cone) (**4**) in phosphate buffer with BSA (1:10) at 25°C ( $5 \times 10^{-6}$  M/ $5 \times 10^{-5}$  M).

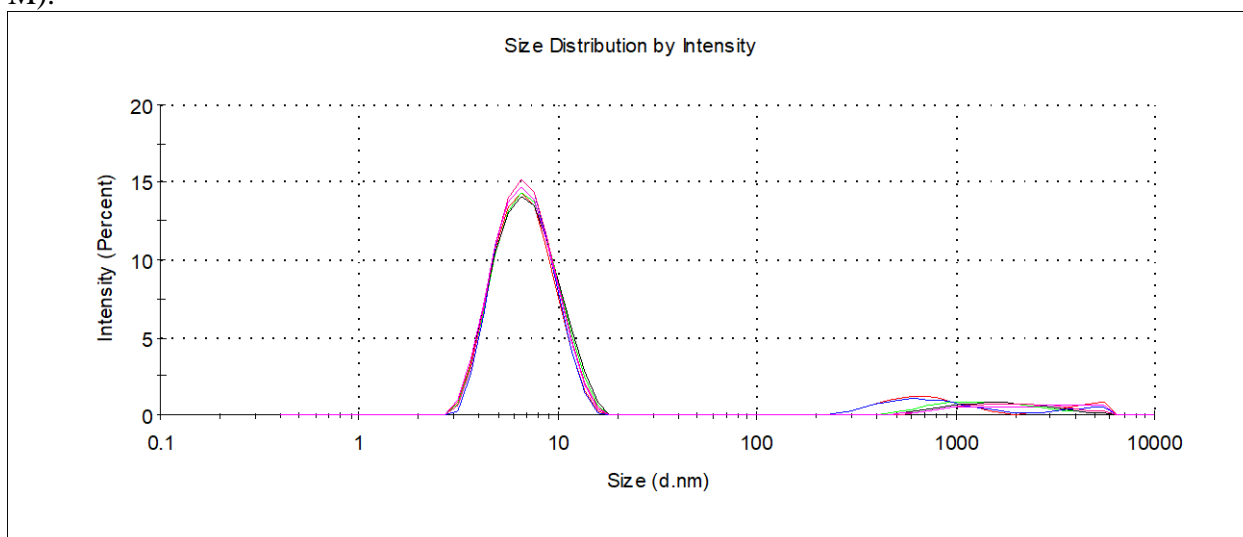

**Figure S34.** Size distribution of 5,11,17,23-tetra-tert-butyl-25,26,27,28-tetrakis[(N-(3',3'-diethyl- 3'-{3''-sulfonatopropyl})ammoniummethyl)-carbamoylmethoxy]-2,8,14,20-tetrathiacalix[4]arene (cone) (**4**) in phosphate buffer with BSA (1:10) at 25°C ( $1 \times 10^{-6}$  M/ $1 \times 10^{-5}$  M).

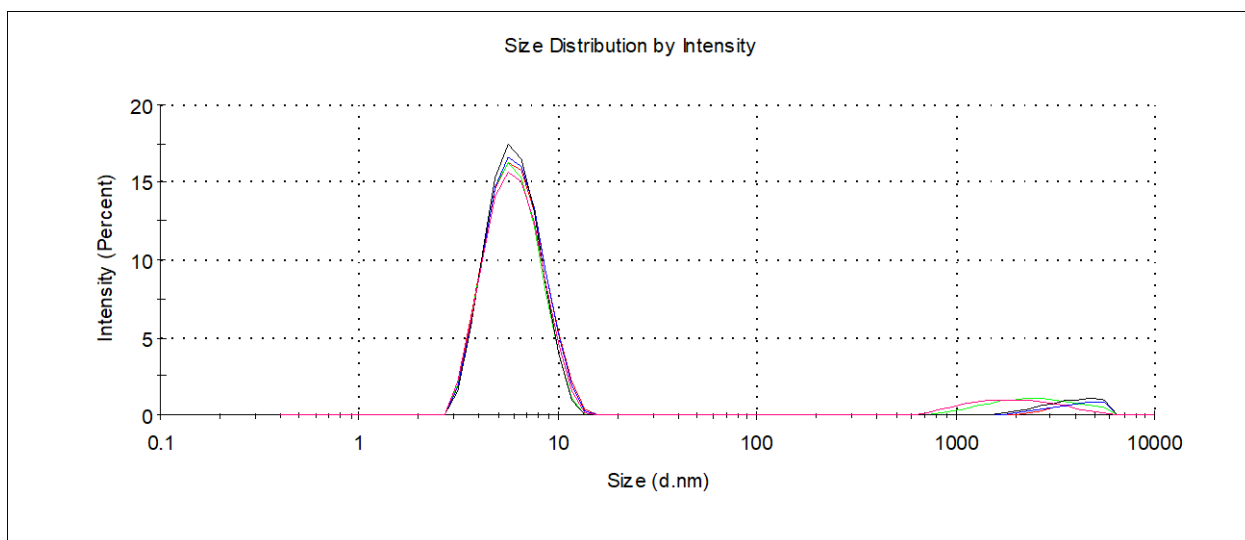

**Figure S35.** Size distribution of BSA in phosphate buffer at 25°C ( $5 \times 10^{-4}$  M).

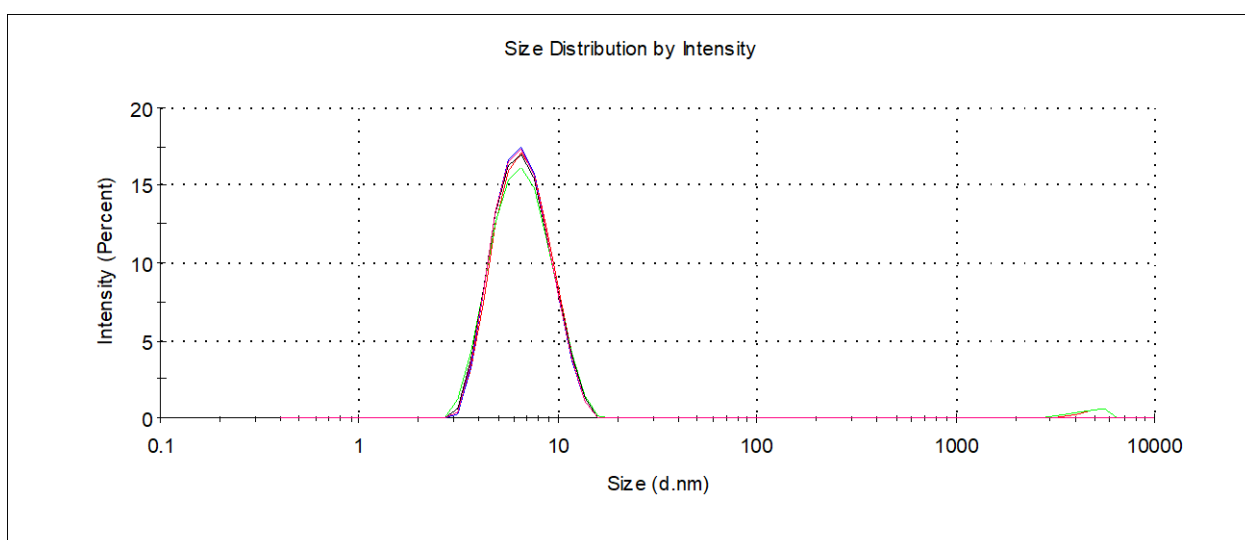

**Figure S36.** Size distribution of BSA in phosphate buffer at 25°C ( $1 \times 10^{-4}$  M).

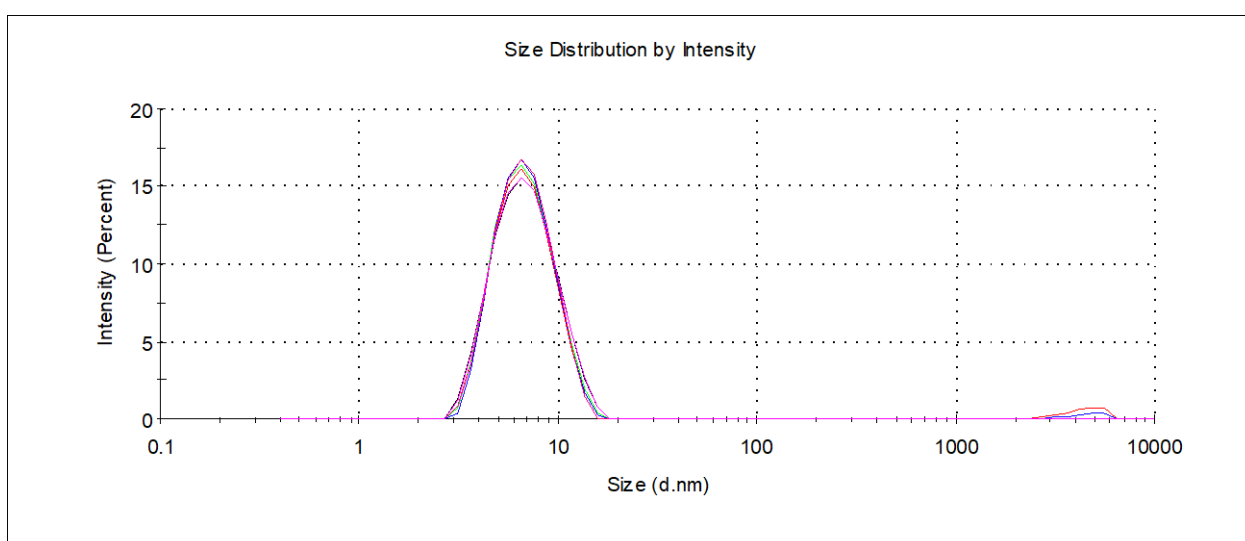

**Figure S37.** Size distribution of BSA in phosphate buffer at 25°C ( $5 \times 10^{-5}$  M).

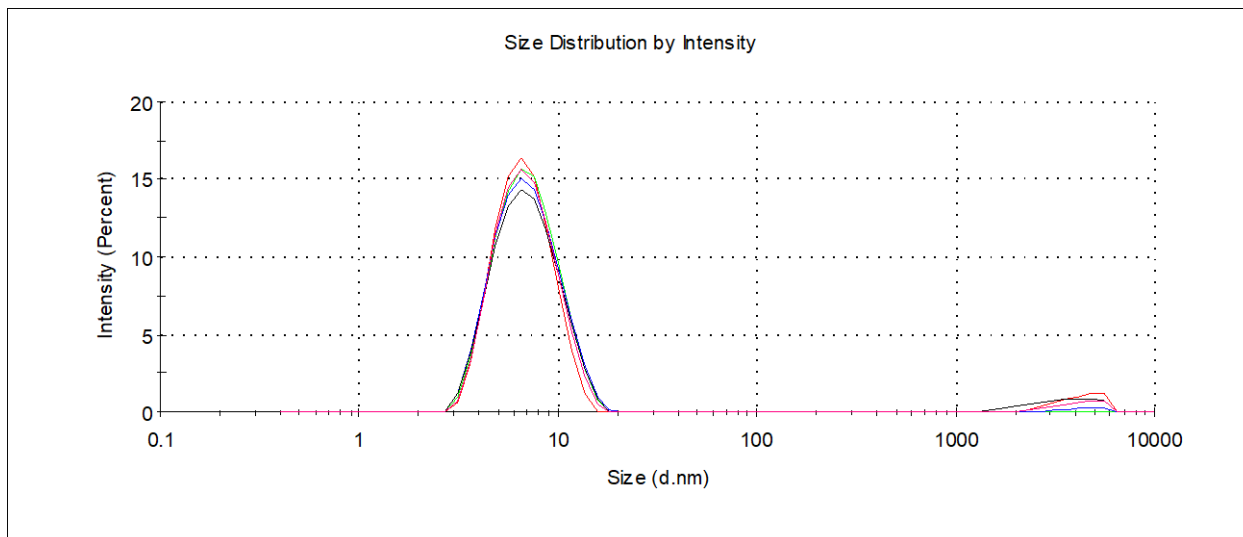

**Figure S38.** Size distribution of BSA in phosphate buffer at 25°C ( $1 \times 10^{-5}$  M).

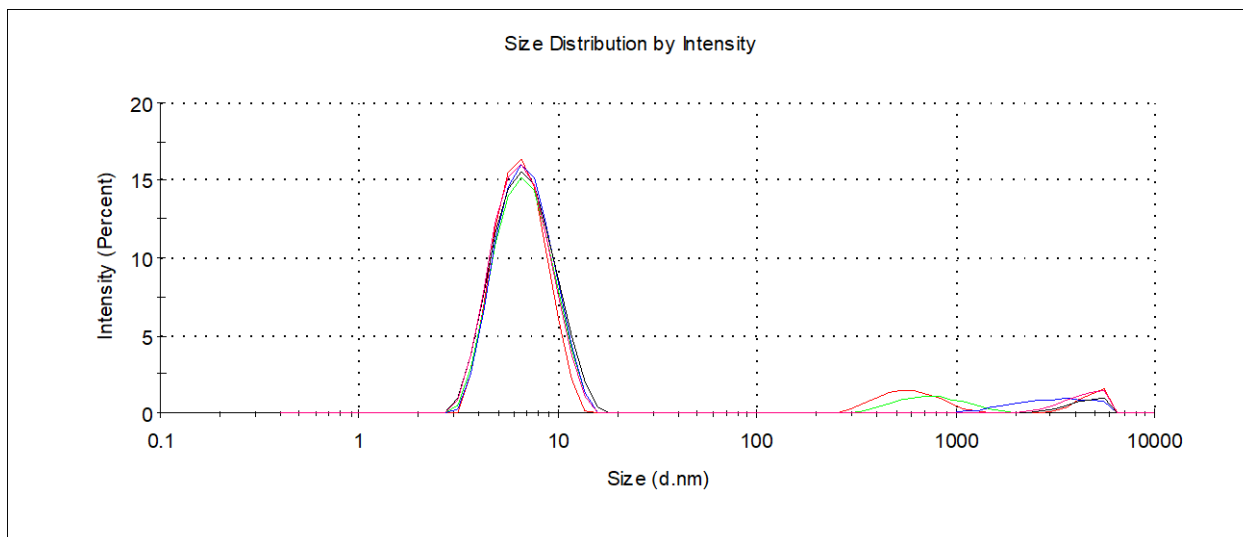

**Figure S39.** Size distribution of BSA in phosphate buffer at 25°C ( $5 \times 10^{-6}$  M).

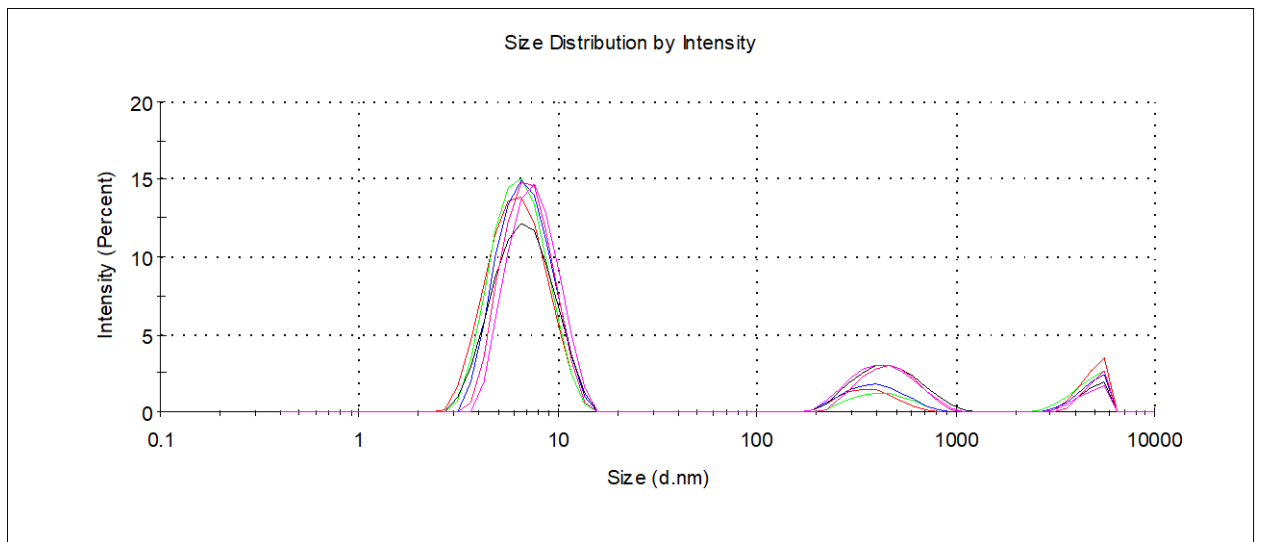

**Figure S40.** Size distribution of BSA in phosphate buffer at 25°C ( $1 \times 10^{-6}$  M).

### 3. UV spectra

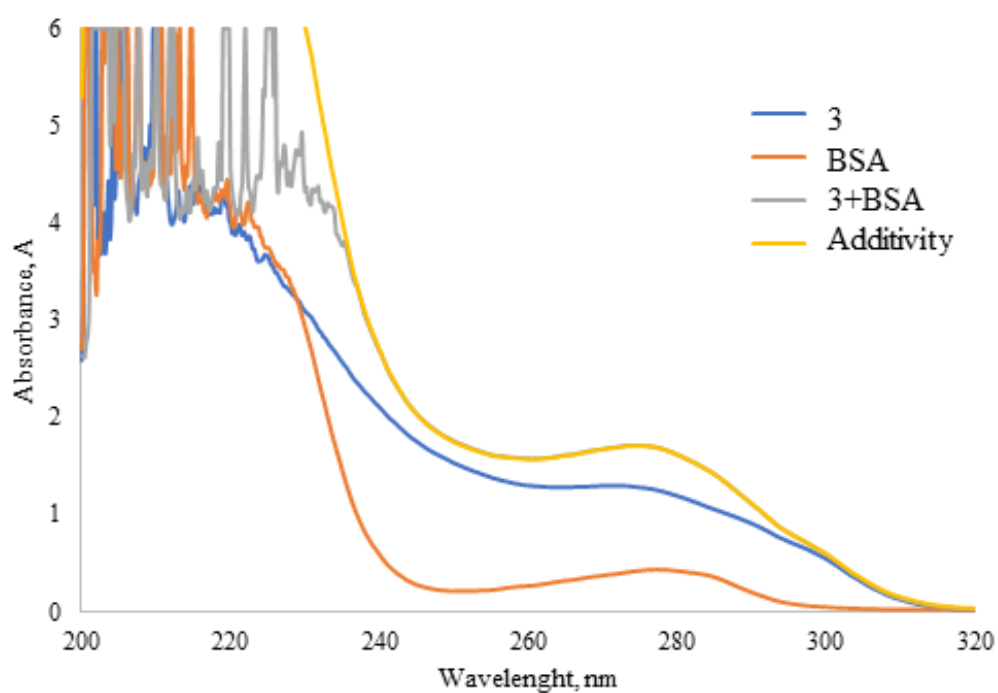

**Figure S41.** UV-*vis* spectra of BSA (300 mkM) in the presence of **3** (300 mkM) in phosphate buffer (pH=7.4).

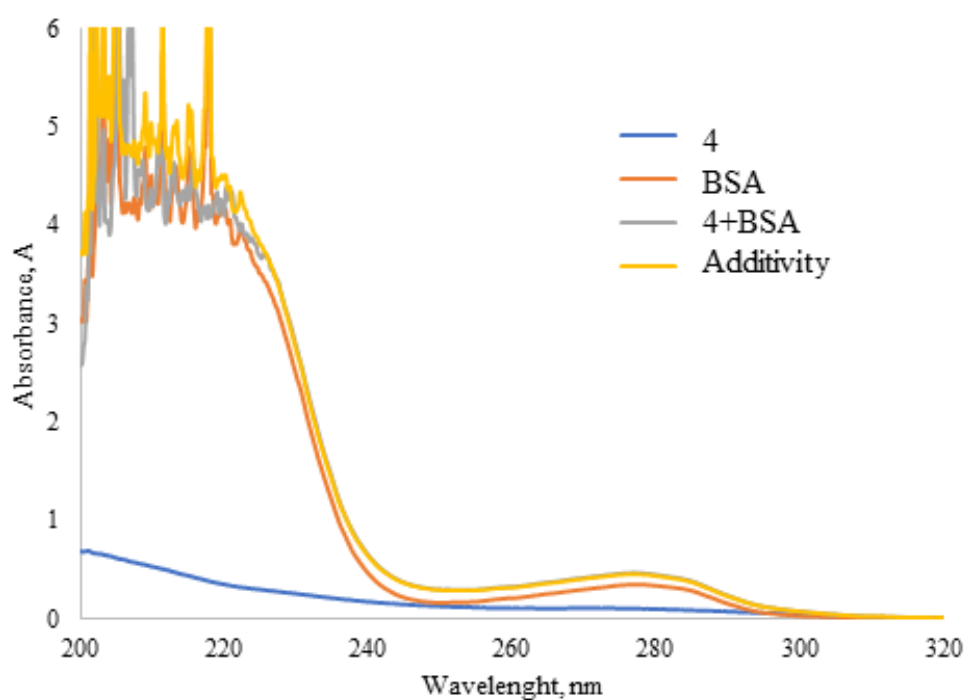

**Figure S42.** UV-*vis* spectra of BSA (300 mkM) in the presence of **4** (300 mkM) in phosphate buffer (pH=7.4).

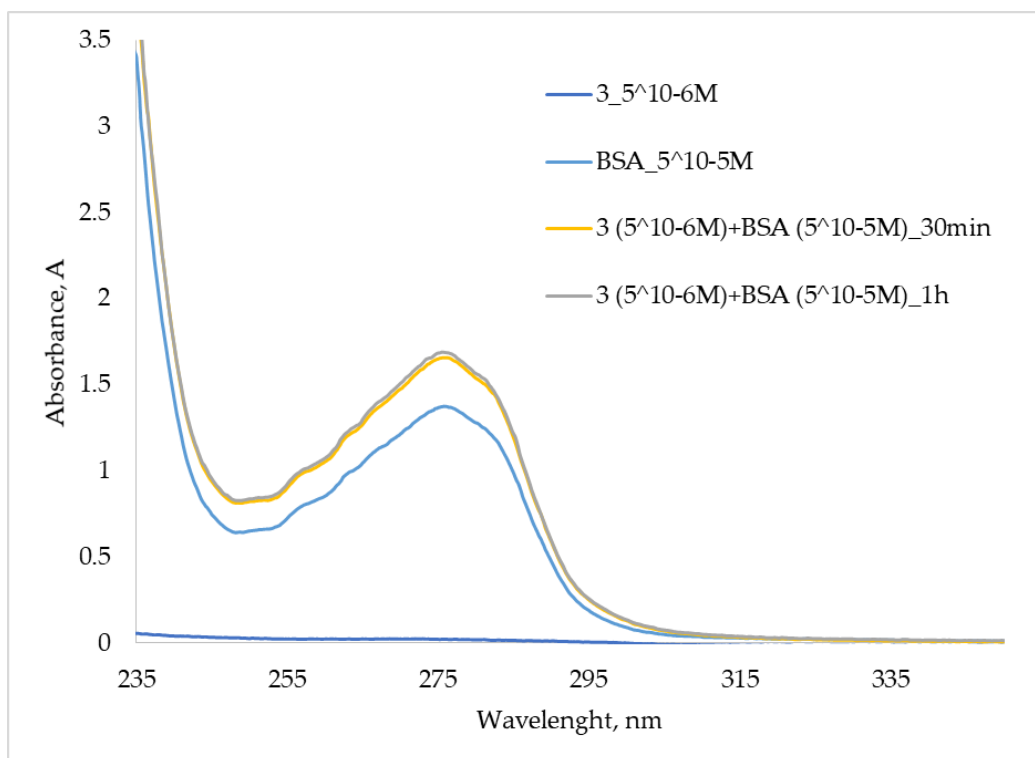

**Figure S43.** UV-*vis* spectra of BSA in the presence of **3** in phosphate buffer (pH=7.4).

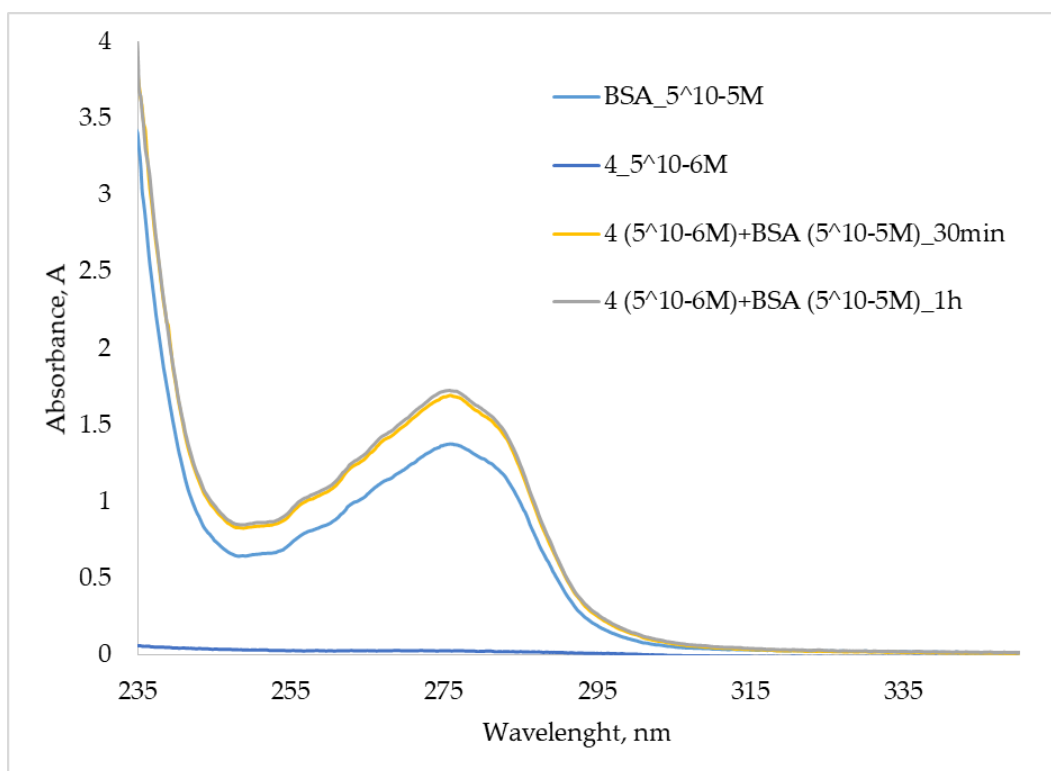

**Figure S44.** UV-*vis* spectra of BSA in the presence of **4** in phosphate buffer (pH=7.4).

#### 4. Fluorescence

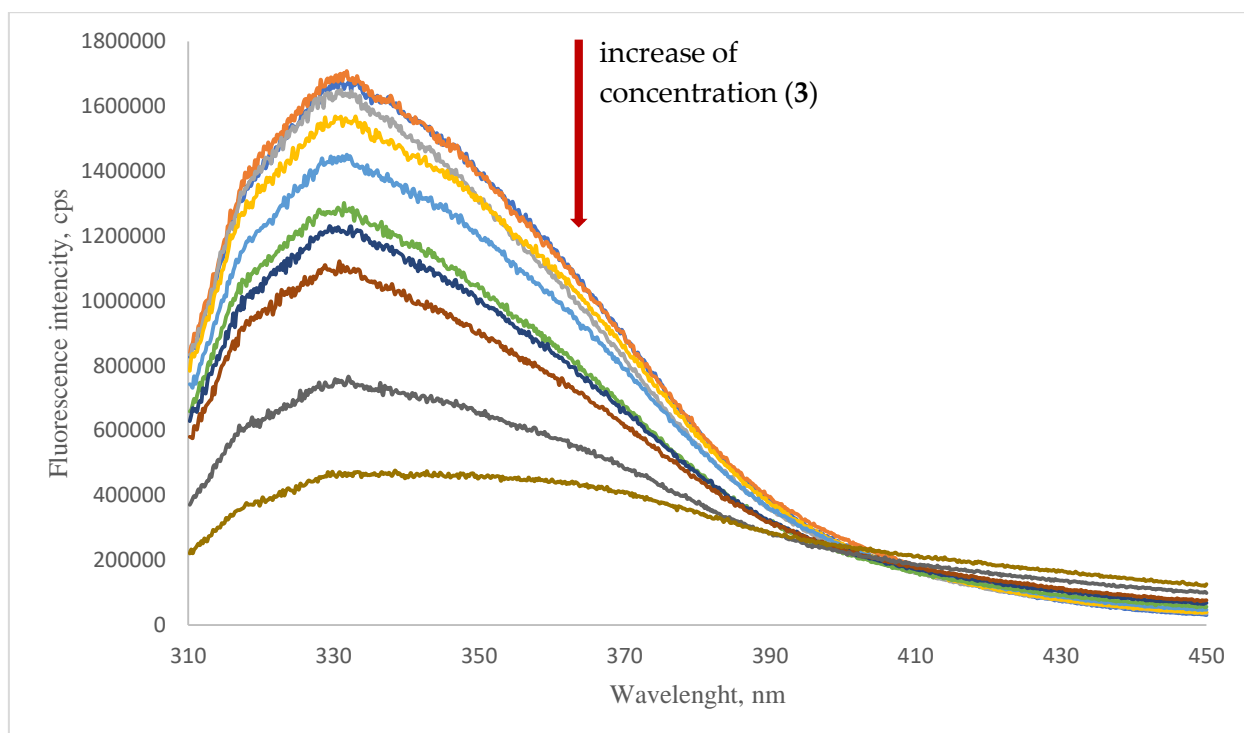

**Figure S45.** Fluorescence spectra of BSA in the presence of **3** at 5 °C.

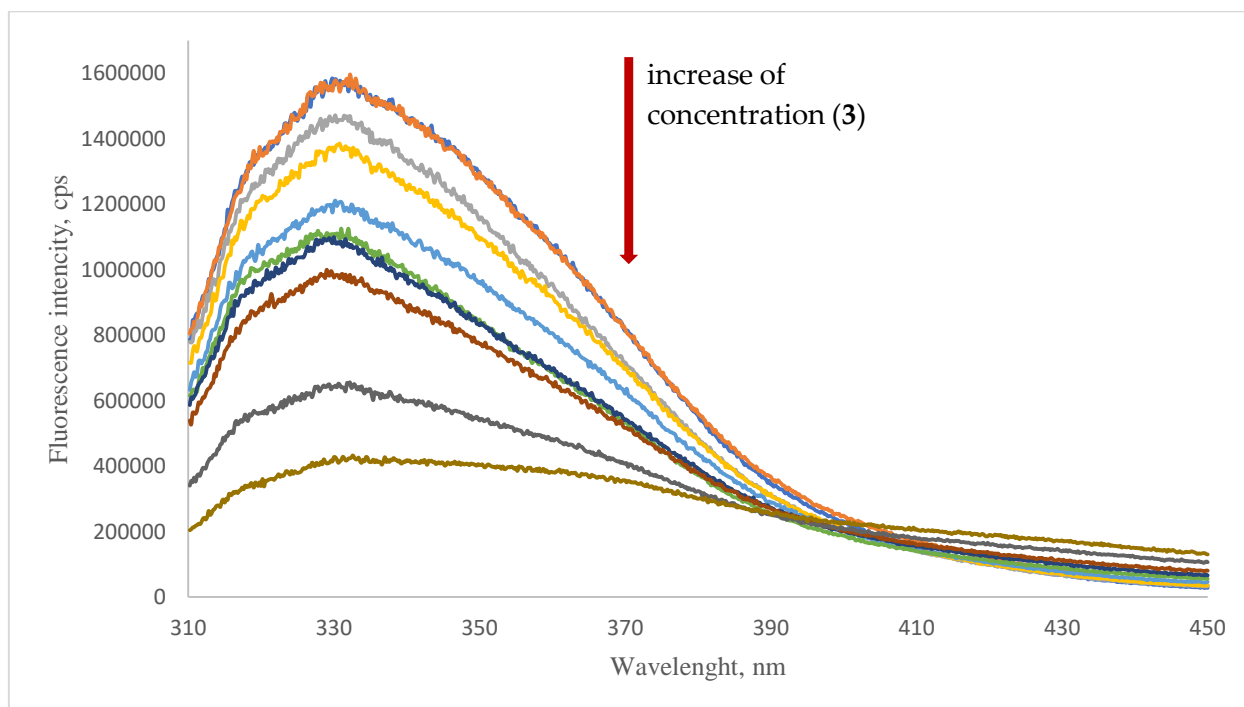

**Figure S46.** Fluorescence spectra of BSA in the presence of **3** at 20 °C.



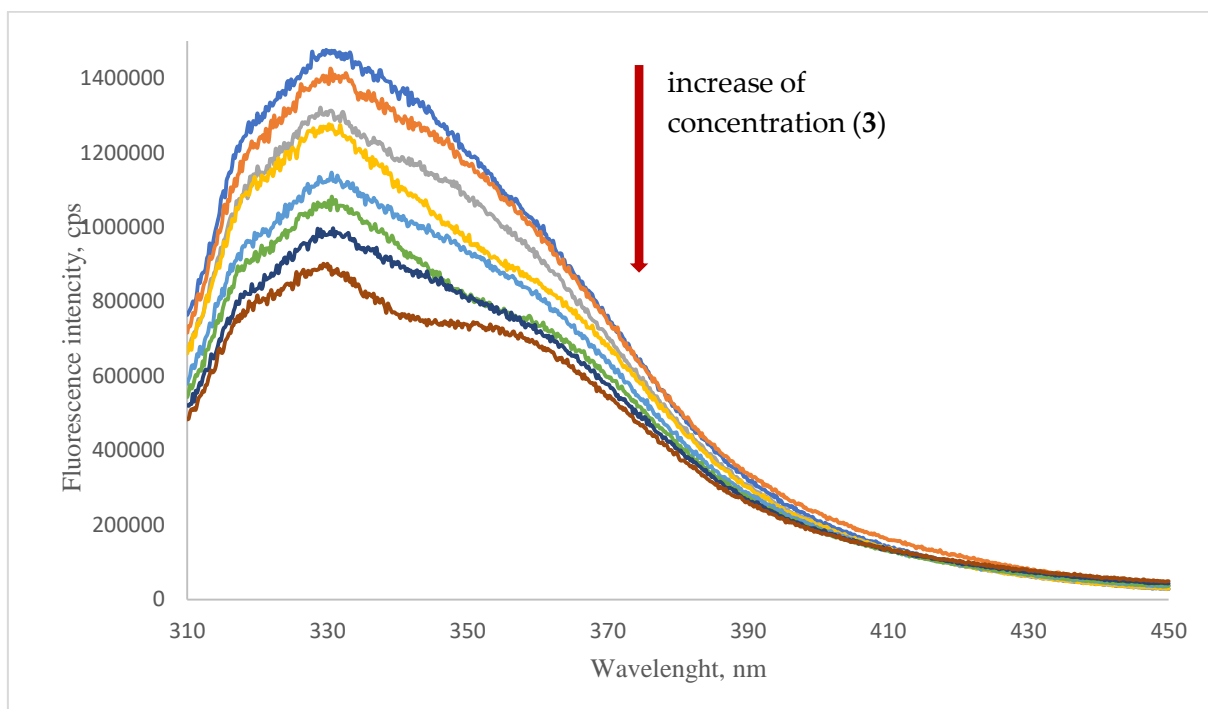

**Figure S47.** Fluorescence spectra of BSA in the presence of **3** at 35 °C.

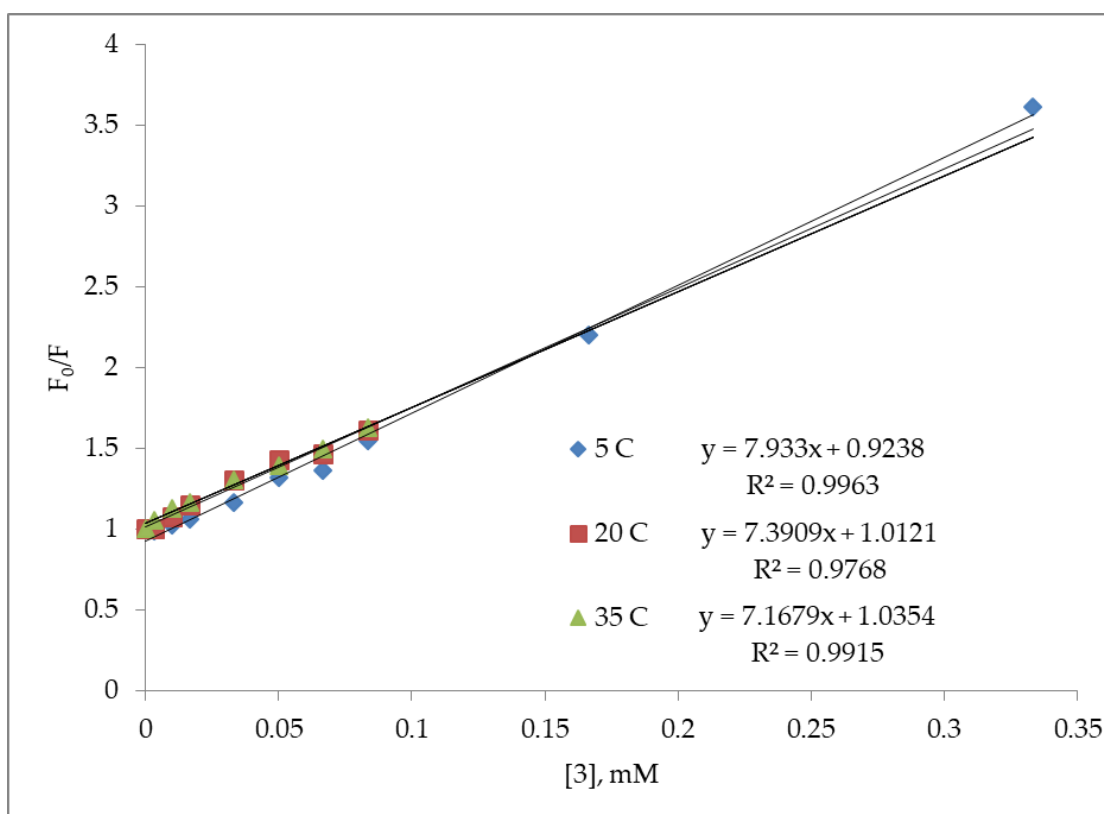

**Figure S48.** The graphs are plotted in the Stern-Volmer coordinates for **3**/BSA system.

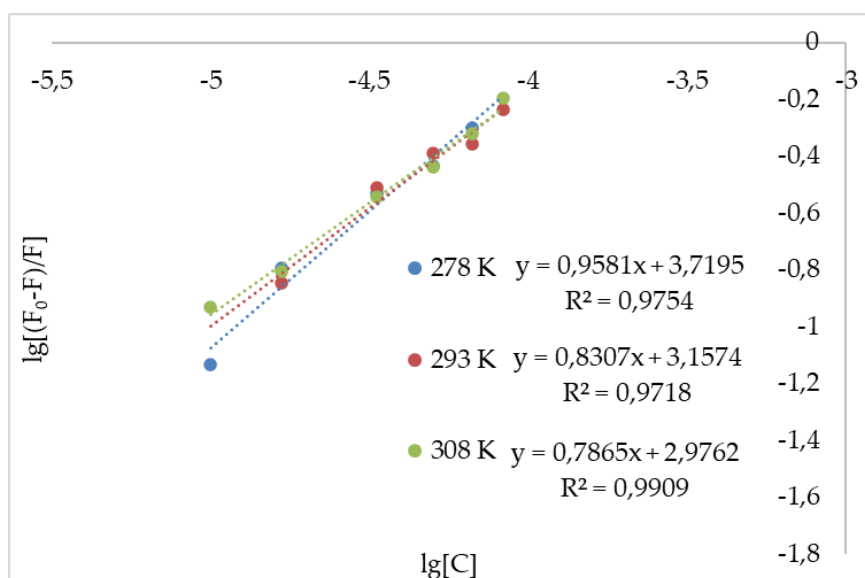

**Figure S49.** A plot of  $\lg[(F_0-F)/F]$  vs.  $\lg [C]$  for 3/BSA system at different temperatures.

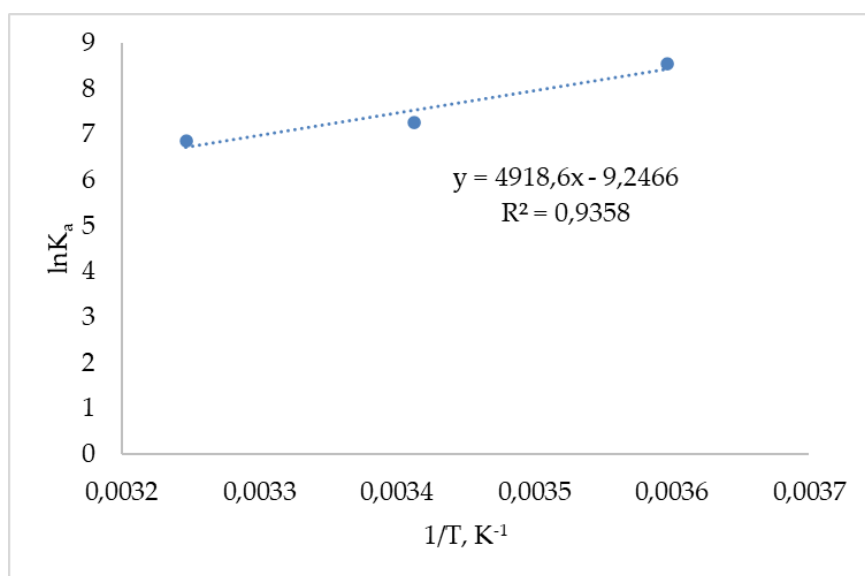

**Figure S50.** van't Hof plot for 3/BSA system at different temperatures.

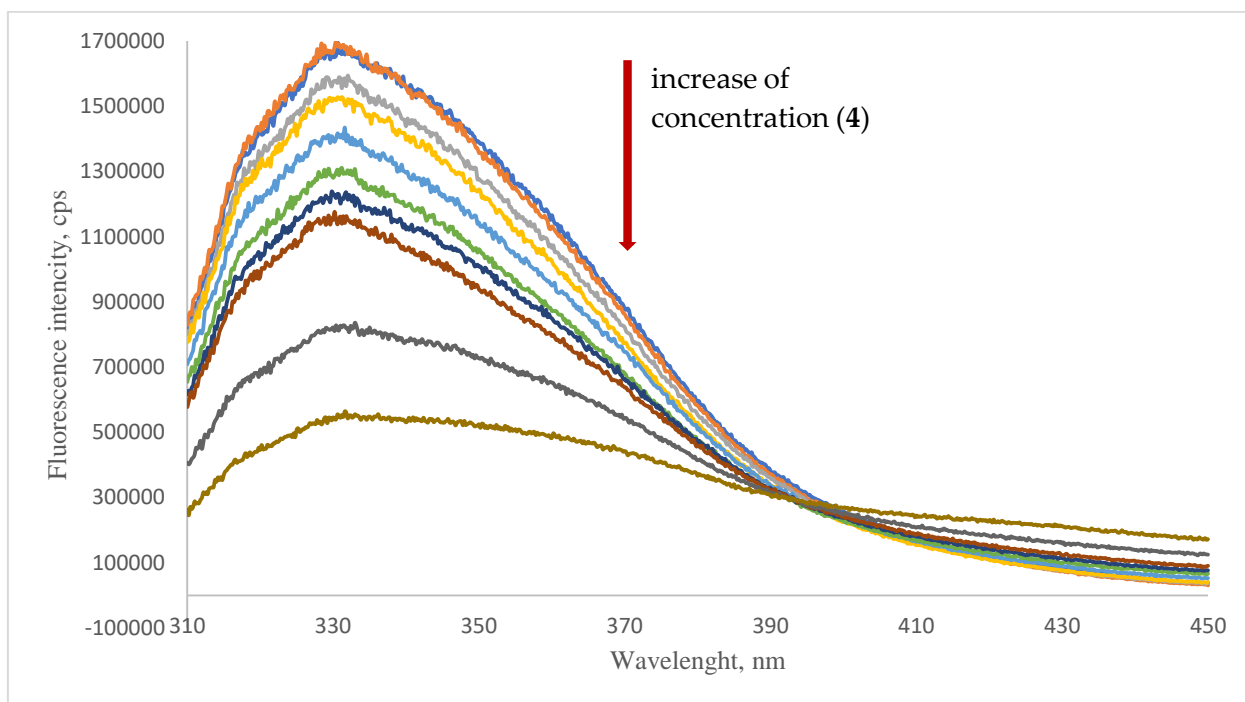

**Figure S51.** Fluorescence spectra of BSA in the presence of **4** at 5 °C.

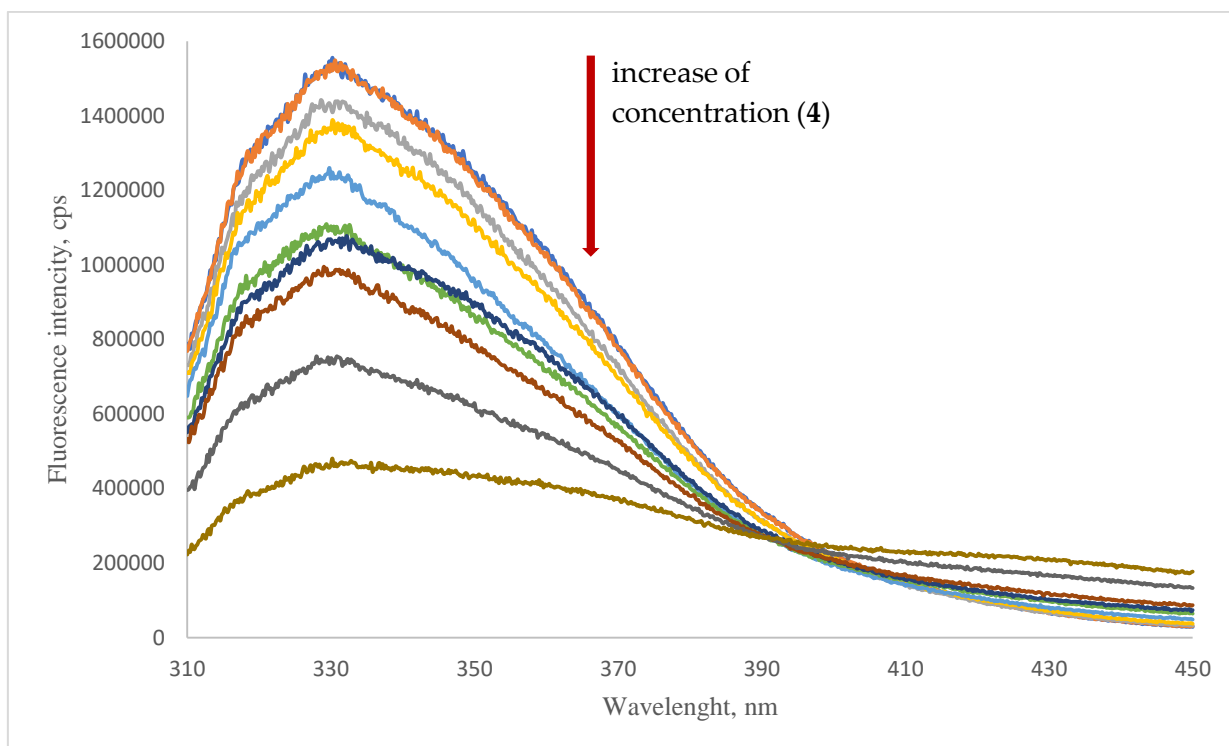

**Figure S52.** Fluorescence spectra of BSA in the presence of **4** at 20 °C.

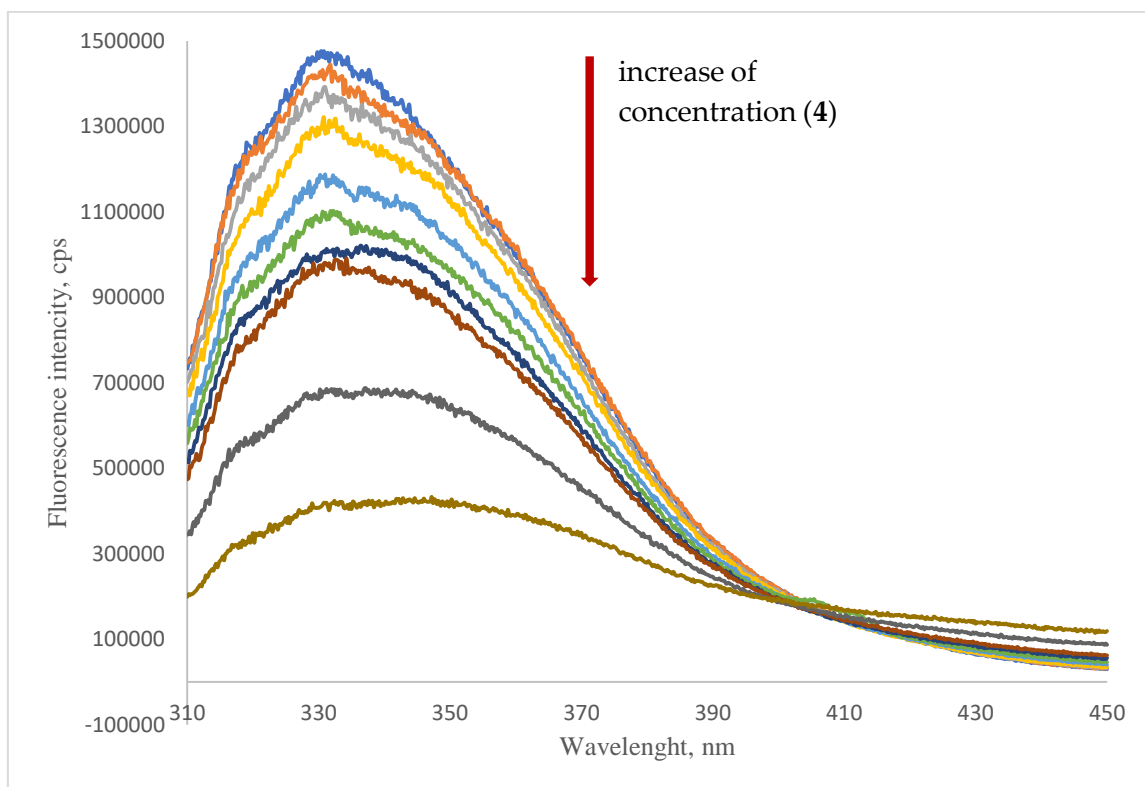

**Figure S53.** Fluorescence spectra of BSA in the presence of **4** at 35 °C.

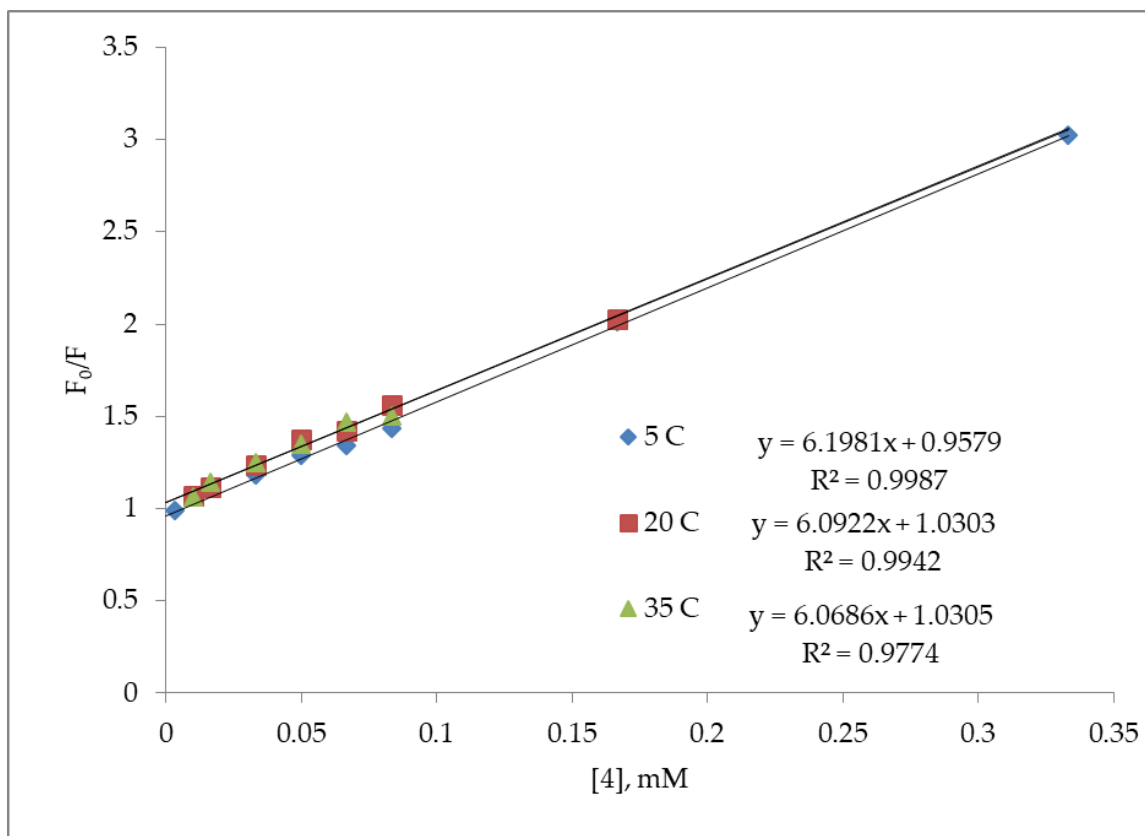

**Figure S54.** The graphs are plotted in the Stern-Volmer coordinates for **4**/BSA system.

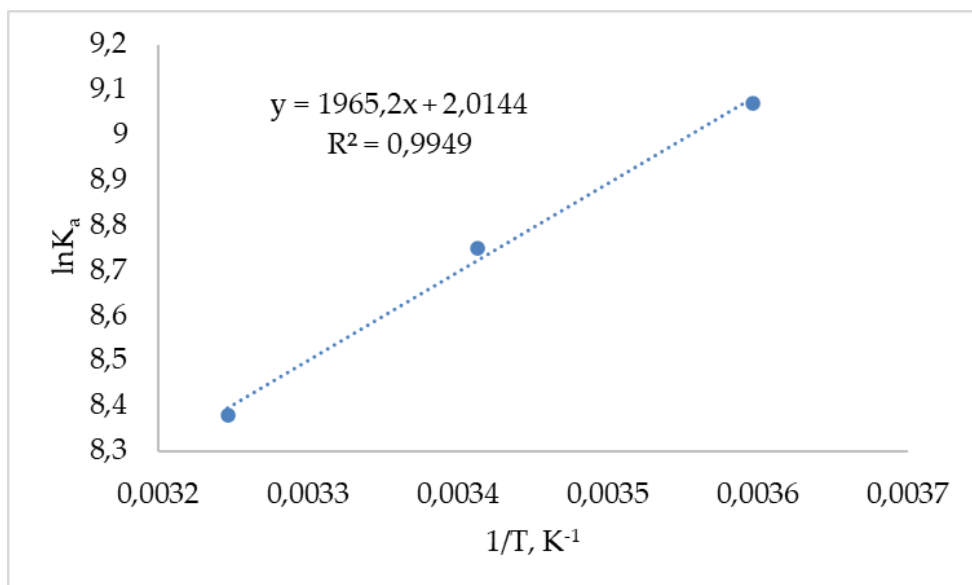

**Figure S55.** van't Hof plot for 4/BSA system at different temperatures.

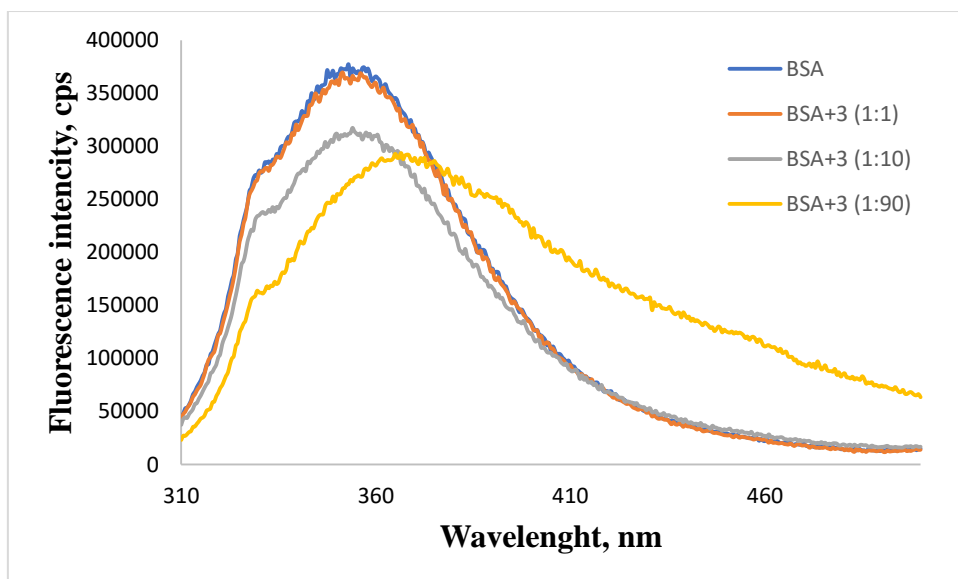

**Figure S56.** Fluorescence spectra of BSA ( $10^{-6}$  M) in the presence of 3 (excitation at 295 nm) in PBS.

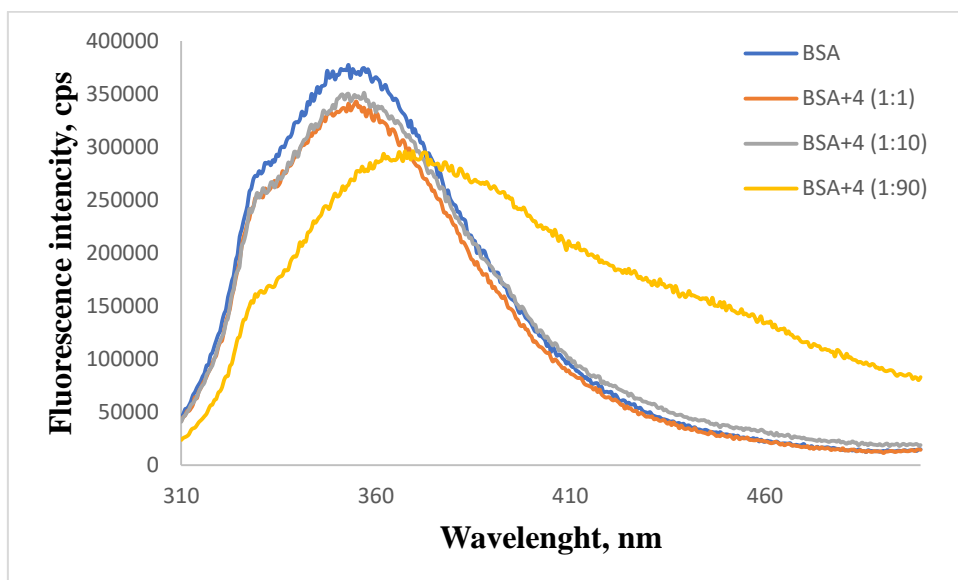

**Figure S57.** Fluorescence spectra of BSA ( $10^{-6}$  M) in the presence of **4** (excitation at 295 nm) in PBS.

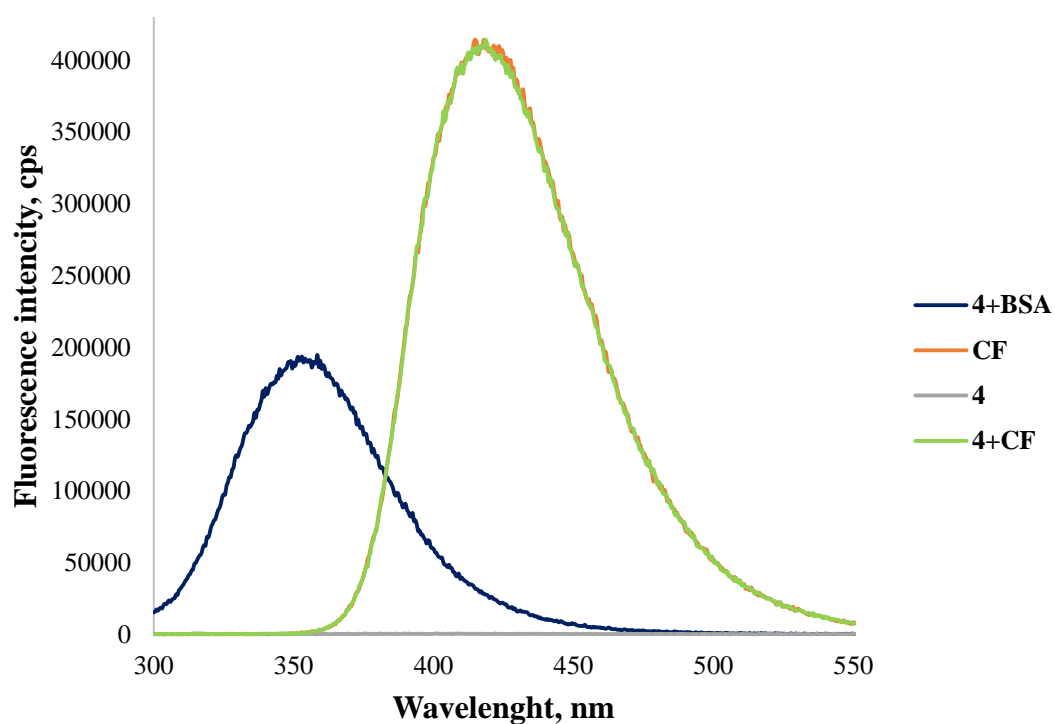

**Figure S58.** Fluorescence spectra of **4** ( $1 \times 10^{-5}$  M), ciprofloxacin ( $4.17 \times 10^{-5}$  M), **4**+BSA system (1/1,  $1 \times 10^{-5}$  M), **4**+ciprofloxacin system (1/1,  $4.17 \times 10^{-5}$  M).

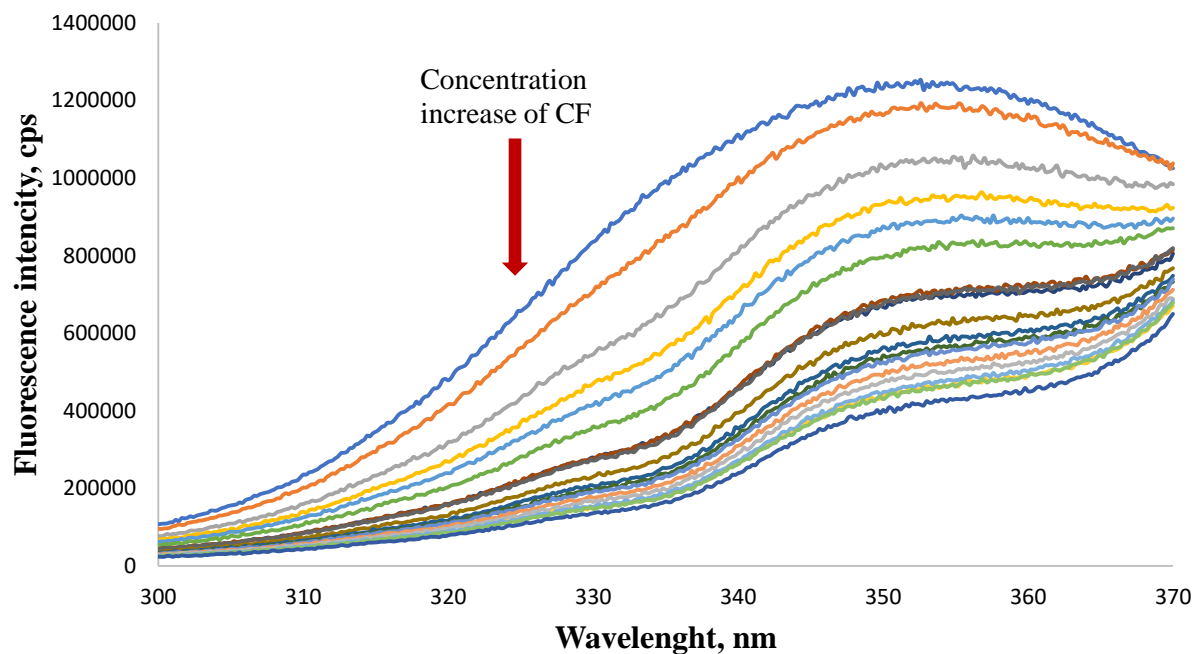

**Figure S59.** Fluorescence spectra of titration of BSA ( $1 \times 10^{-5}$  M) with ciprofloxacin (concentration changed from 0 to  $4 \times 10^{-4}$  M).

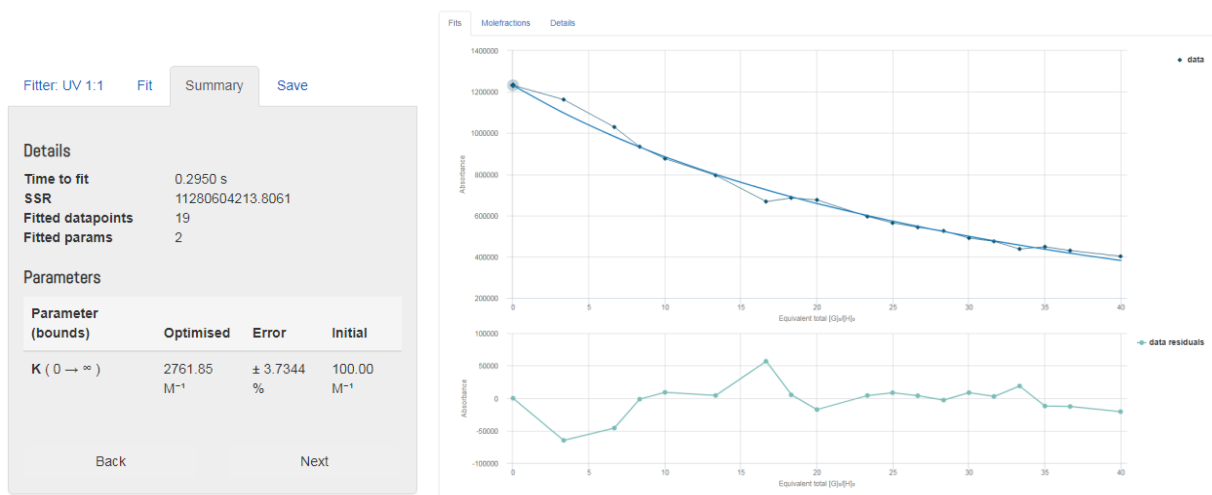

**Figure S60.** Bindfit (Fit data to 1:1 Host-Guest equilibria). Screenshots taken from the summary window of the website supramolecular.org. This screenshots shows the raw data for fluorescence titration of BSA with ciprofloxacin, the data fitted to 1:1 binding model.

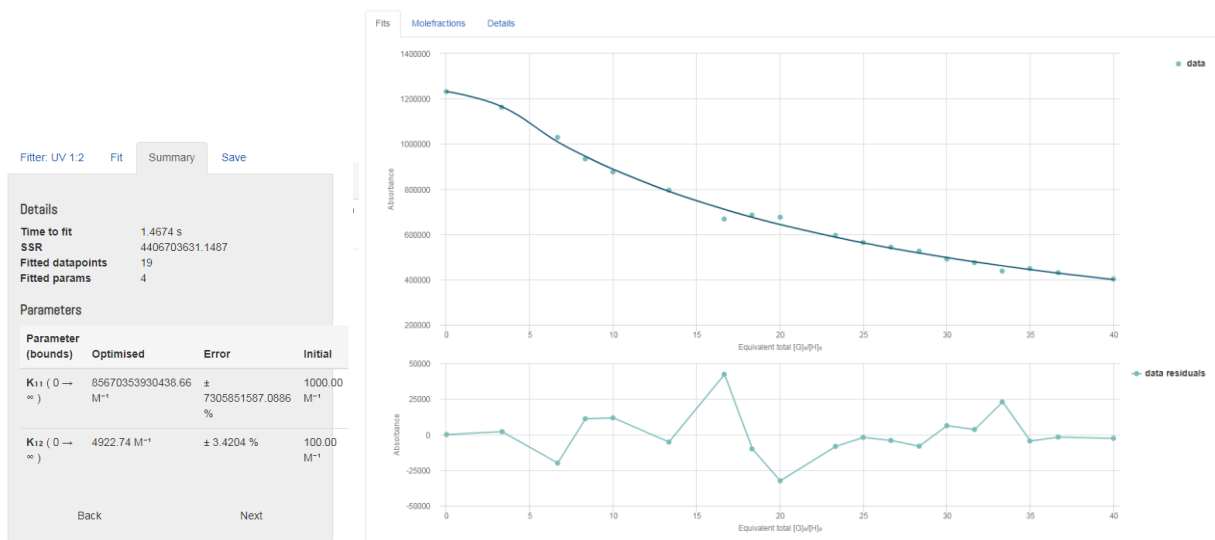

**Figure S61.** Bindfit (Fit data to 1:2 Host-Guest equilibria). Screenshots taken from the summary window of the website [supramolecular.org](http://supramolecular.org). This screenshots shows the raw data for fluorescence titration of BSA with ciprofloxacin, the data fitted to 1:2 binding model.

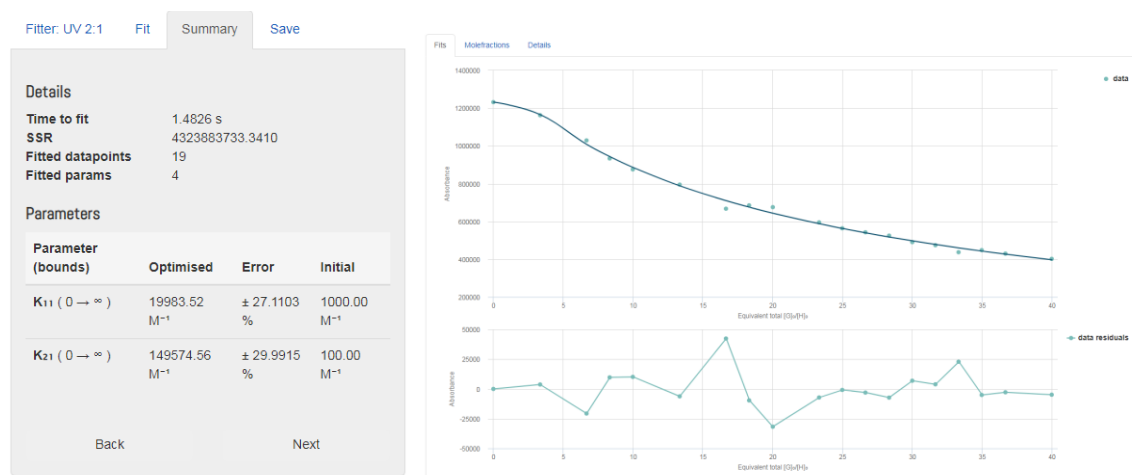

**Figure S62.** Bindfit (Fit data to 2:1 Host-Guest equilibria). Screenshots taken from the summary window of the website [supramolecular.org](http://supramolecular.org). This screenshots shows the raw data for fluorescence titration of BSA with ciprofloxacin, the data fitted to 2:1 binding model.



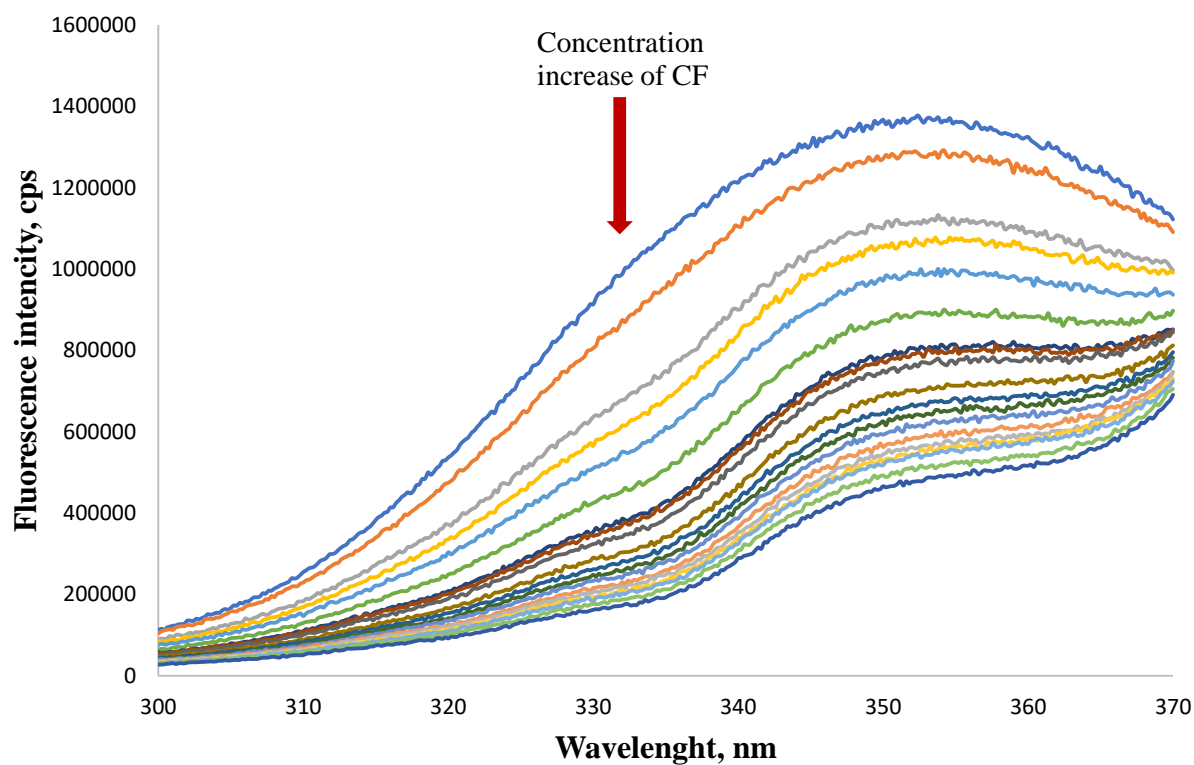

**Figure S63.** Fluorescence spectra of titration of **3** ( $1 \times 10^{-5}$  M)/BSA ( $1 \times 10^{-5}$  M) with ciprofloxacin (concentration changed from 0 to  $4 \times 10^{-4}$  M).

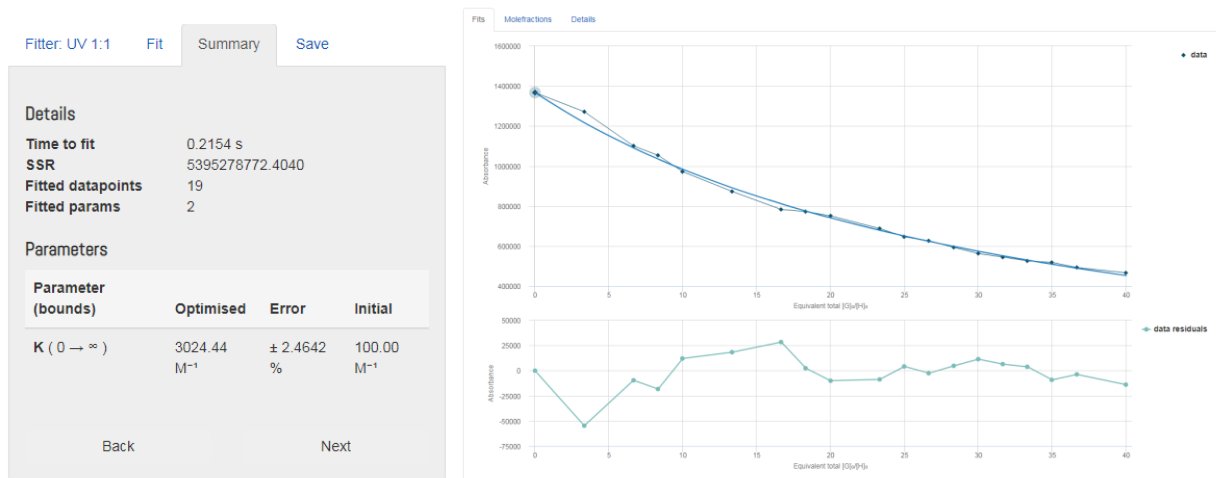

**Figure S64.** Bindfit (Fit data to 1:1 Host-Guest equilibria). Screenshots taken from the summary window of the website supramolecular.org. This screenshots shows the raw data for fluorescence titration of **3**/BSA (1:1) with ciprofloxacin, the data fitted to 1:1 binding model.

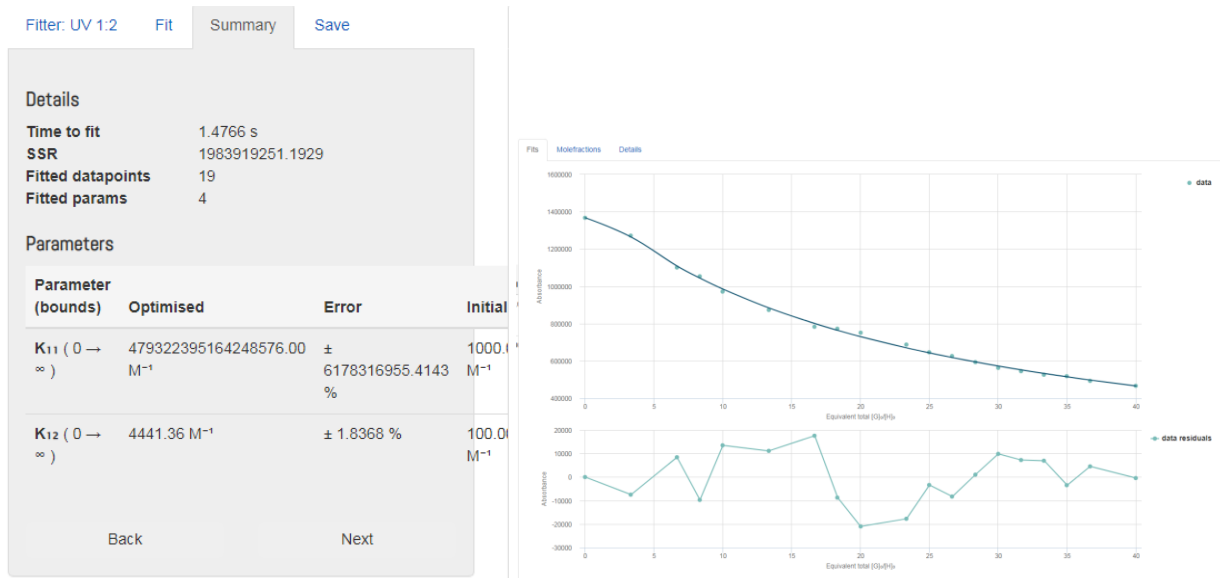

**Figure S65.** Bindfit (Fit data to 1:2 Host-Guest equilibria). Screenshots taken from the summary window of the website [supramolecular.org](http://supramolecular.org). This screenshots shows the raw data for fluorescence titration of **3**/BSA (1:1) with ciprofloxacin, the data fitted to 1:2 binding model.

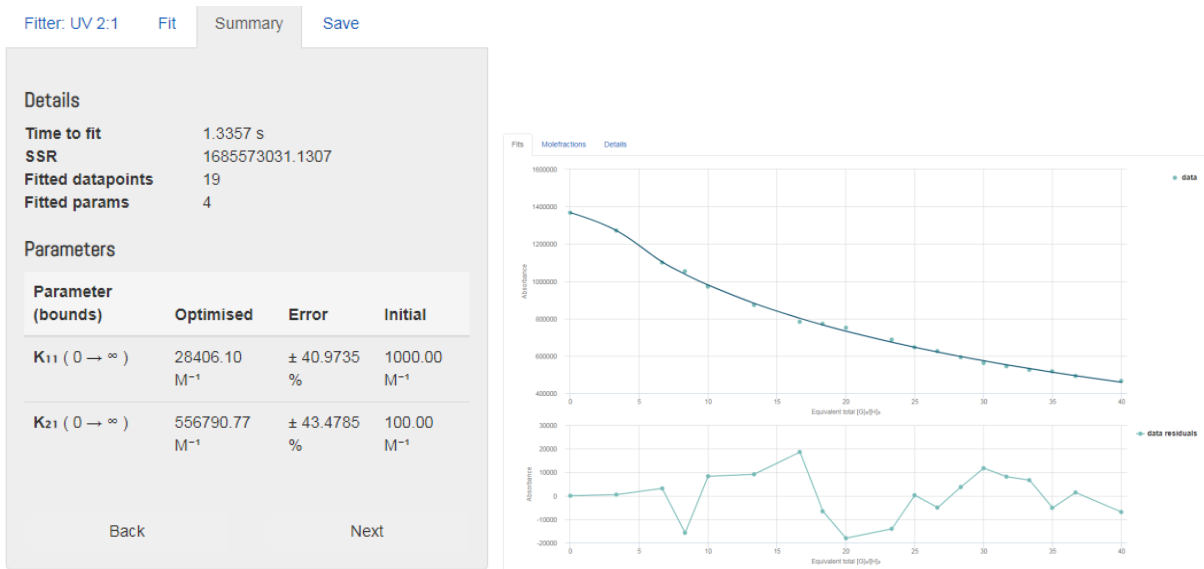

**Figure S66.** Bindfit (Fit data to 2:1 Host-Guest equilibria). Screenshots taken from the summary window of the website [supramolecular.org](http://supramolecular.org). This screenshots shows the raw data for fluorescence titration of **3**/BSA (1:1) with ciprofloxacin, the data fitted to 2:1 binding model.

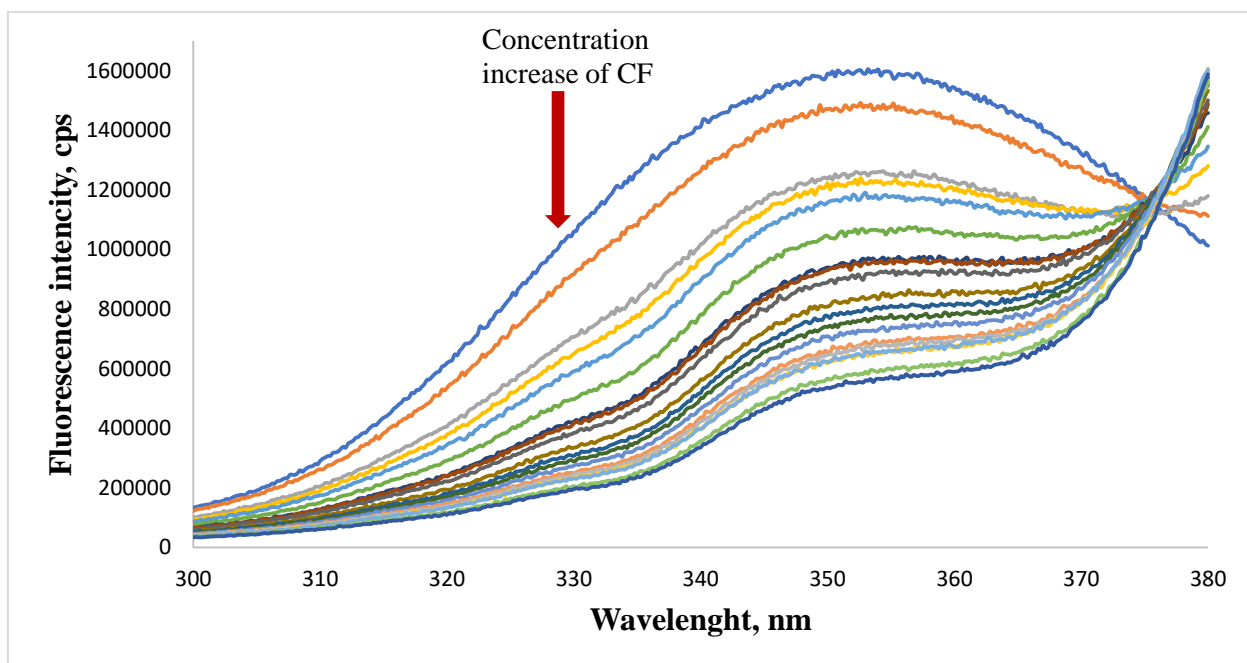

**Figure S67.** Fluorescence spectra of titration of **3** ( $1 \times 10^{-5}$  M)/BSA ( $1 \times 10^{-4}$  M) with ciprofloxacin (concentration changed from 0 to  $4 \times 10^{-4}$  M).

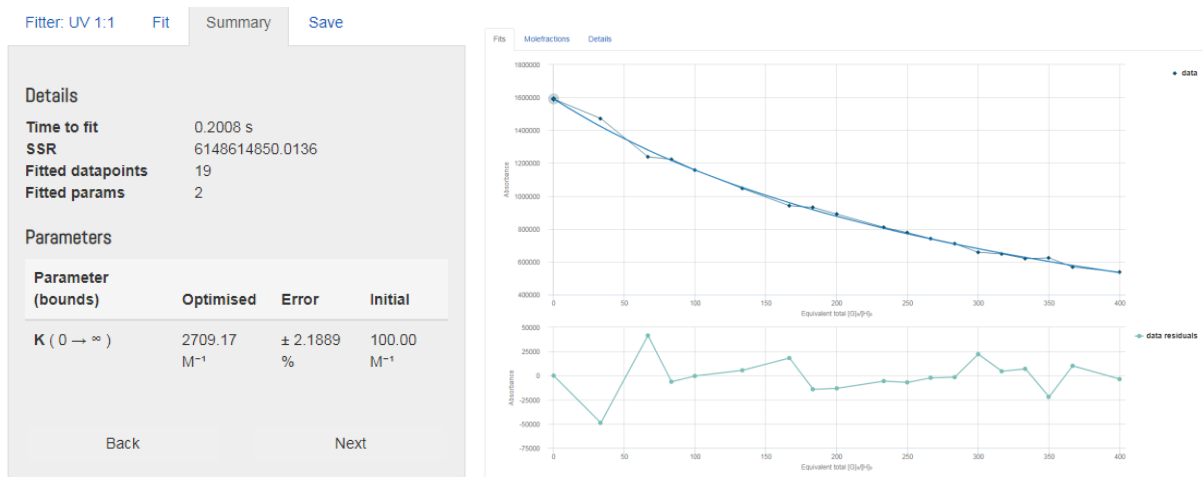

**Figure S68.** Bindfit (Fit data to 1:1 Host-Guest equilibria). Screenshots taken from the summary window of the website supramolecular.org. This screenshots shows the raw data for fluorescence titration of **3**/BSA (1:10) with ciprofloxacin, the data fitted to 1:1 binding model.

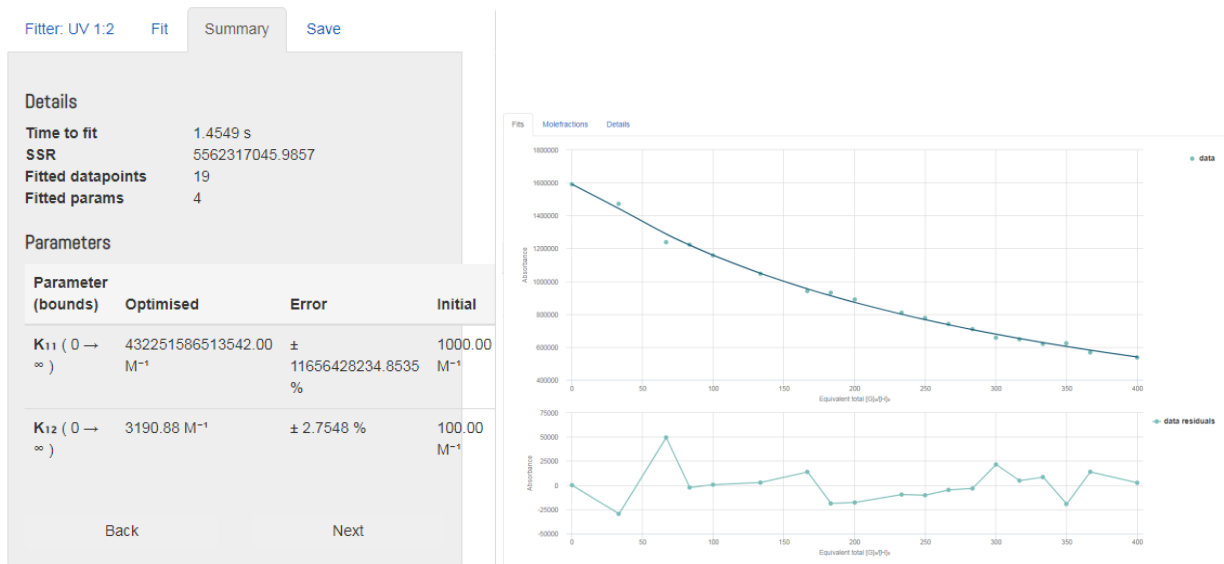

**Figure S69.** Bindfit (Fit data to 1:2 Host-Guest equilibria). Screenshots taken from the summary window of the website [supramolecular.org](http://supramolecular.org). This screenshots shows the raw data for fluorescence titration of **3**/BSA (1:10) with ciprofloxacin, the data fitted to 1:2 binding model.

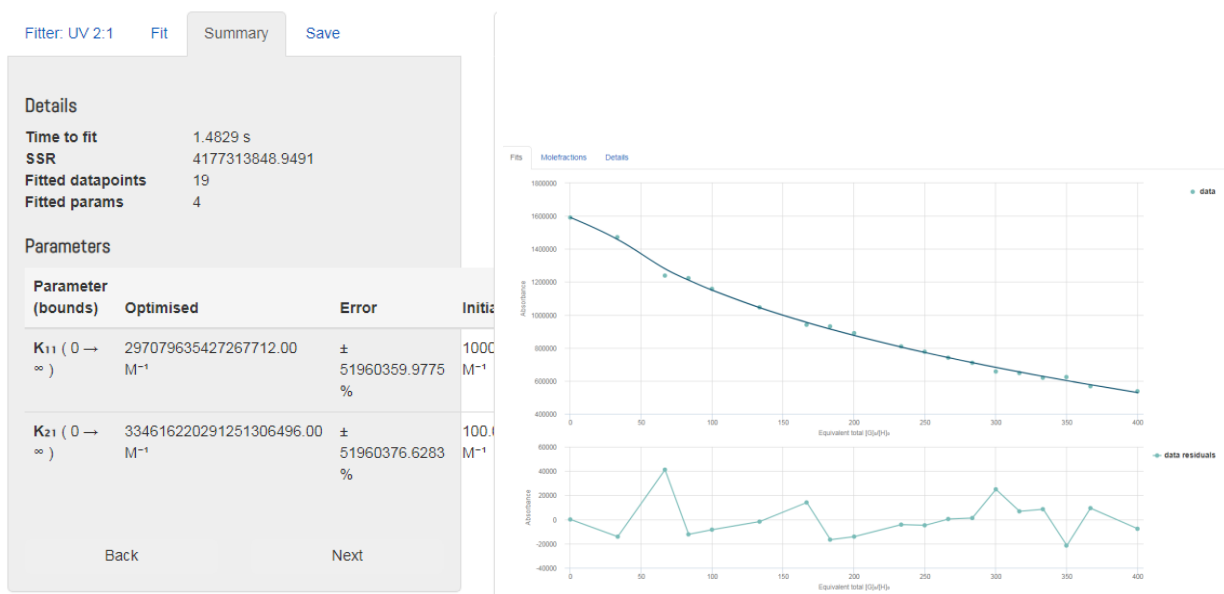

**Figure S70.** Bindfit (Fit data to 2:1 Host-Guest equilibria). Screenshots taken from the summary window of the website [supramolecular.org](http://supramolecular.org). This screenshots shows the raw data for fluorescence titration of **3**/BSA (1:10) with ciprofloxacin, the data fitted to 2:1 binding model.

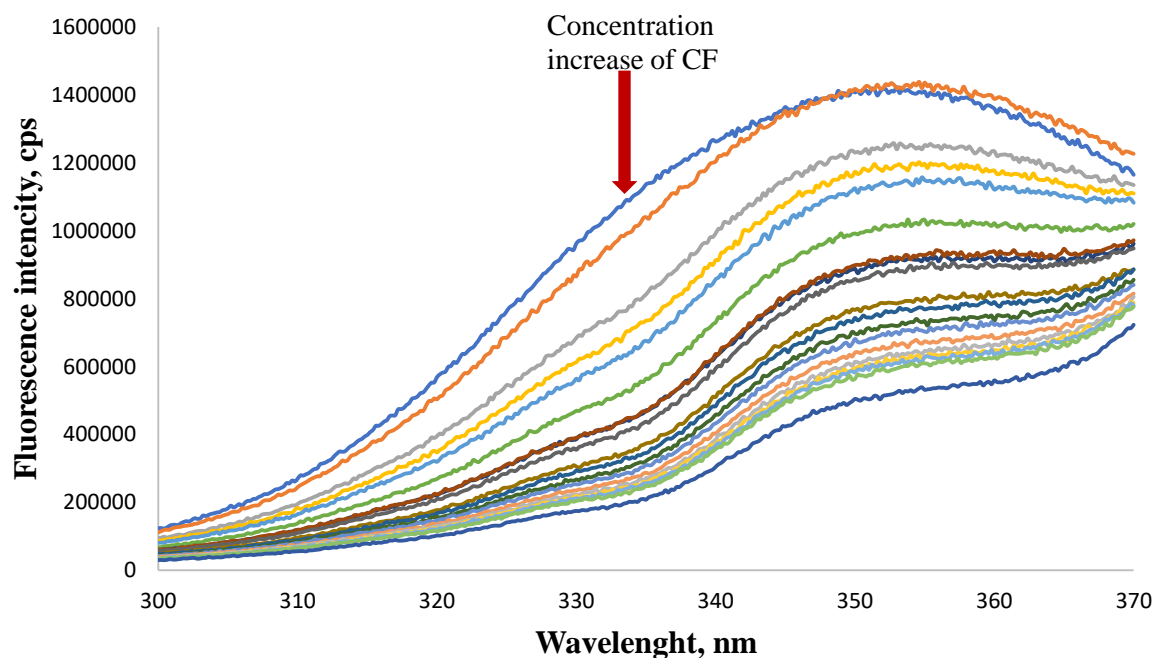

**Figure S71.** Fluorescence spectra of titration of **4** ( $1 \times 10^{-5}$  M)/BSA ( $1 \times 10^{-5}$  M) with ciprofloxacin (concentration changed from 0 to  $4 \times 10^{-4}$  M).

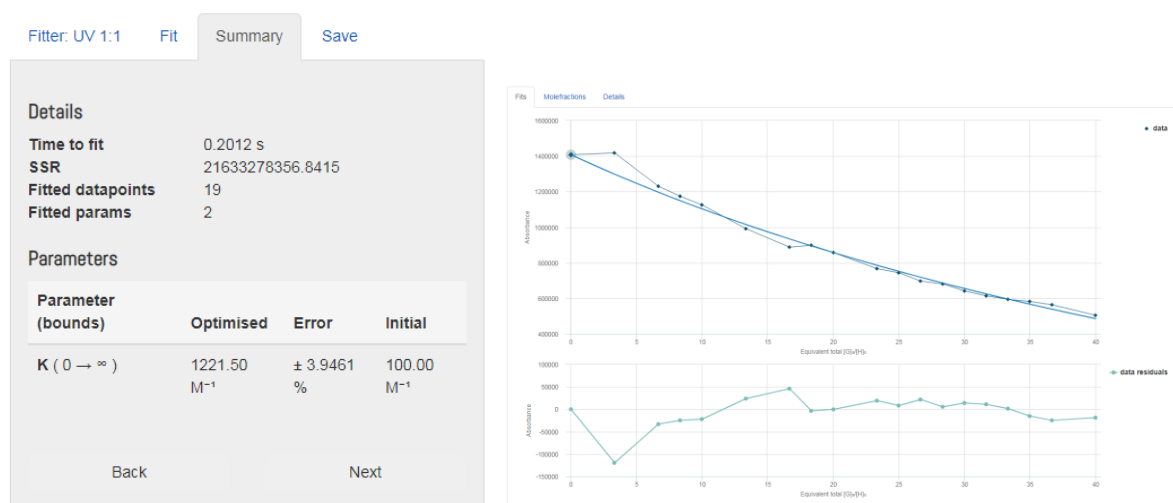

**Figure S72.** Bindfit (Fit data to 1:1 Host-Guest equilibria). Screenshots taken from the summary window of the website supramolecular.org. This screenshot shows the raw data for fluorescence titration of **4**/BSA (1:1) with ciprofloxacin, the data fitted to 1:1 binding model.

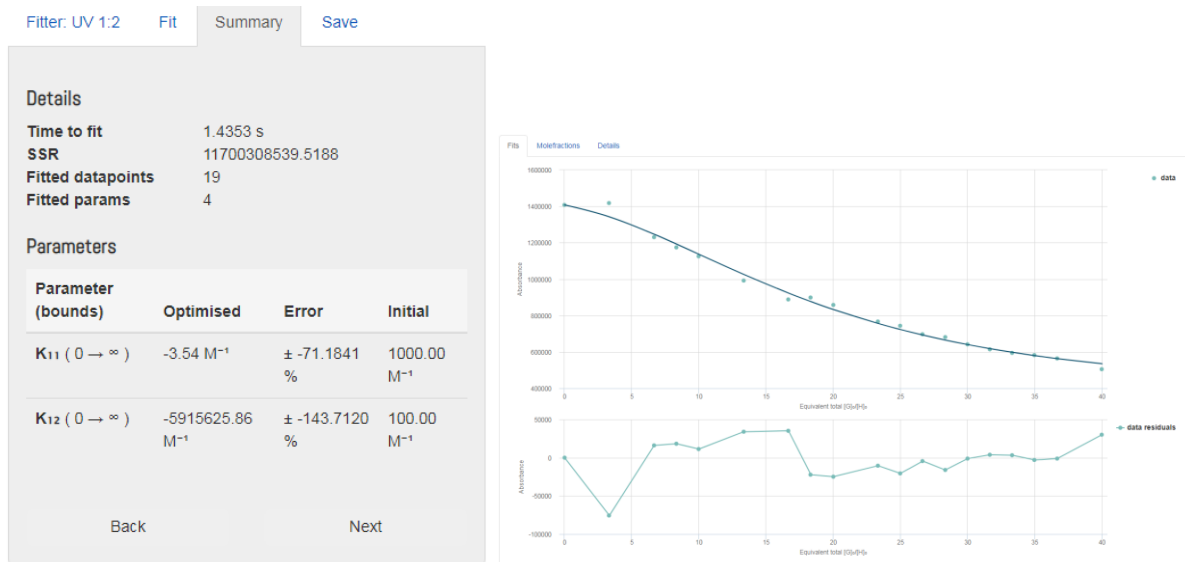

**Figure S73.** Bindfit (Fit data to 1:2 Host-Guest equilibria). Screenshots taken from the summary window of the website supramolecular.org. This screenshots shows the raw data for fluorescence titration of **4**/BSA (1:1) with ciprofloxacin, the data fitted to 1:2 binding model.

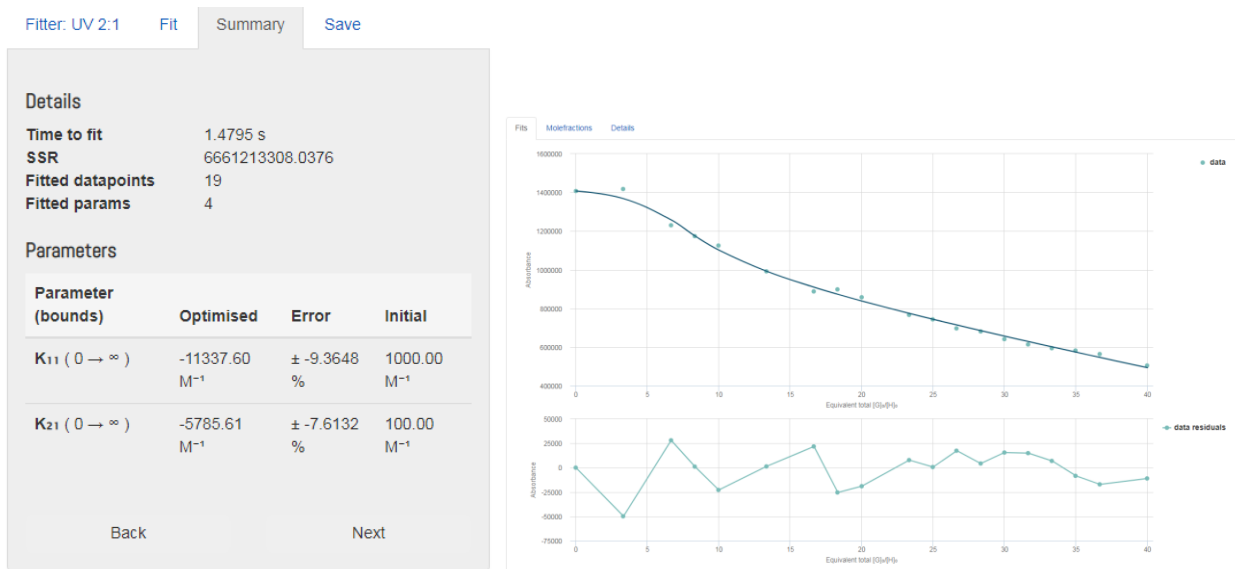

**Figure S74.** Bindfit (Fit data to 2:1 Host-Guest equilibria). Screenshots taken from the summary window of the website supramolecular.org. This screenshots shows the raw data for fluorescence titration of **4**/BSA (1:1) with ciprofloxacin, the data fitted to 2:1 binding model.

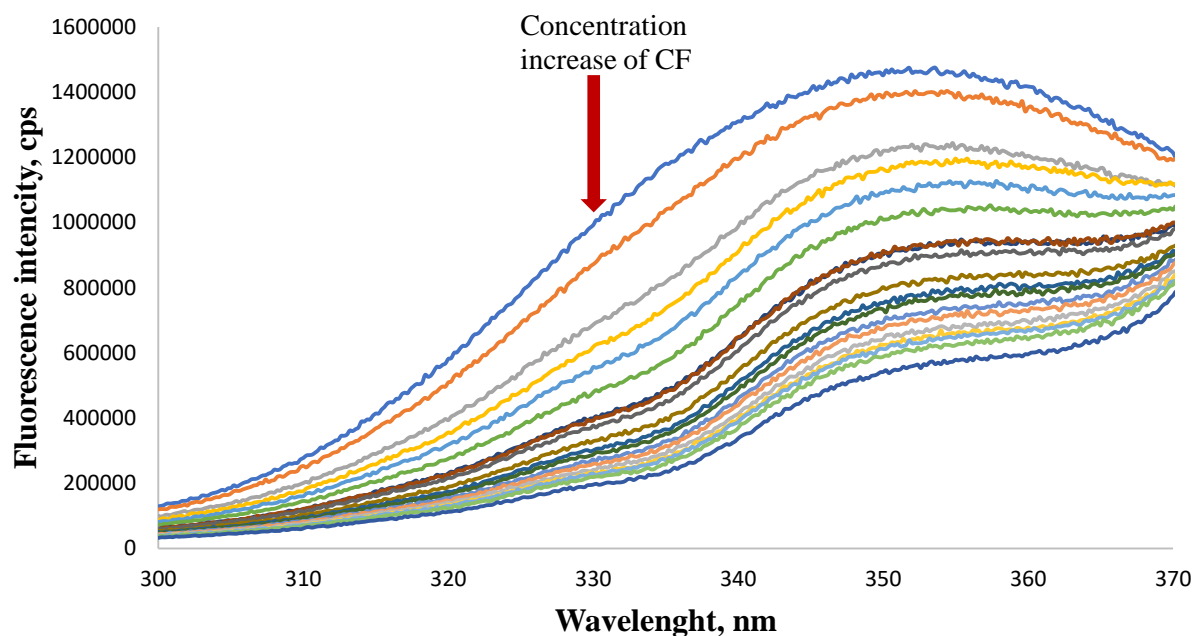

**Figure S75.** Fluorescence spectra of titration of **4** ( $1 \times 10^{-5}$  M)/BSA ( $1 \times 10^{-4}$  M) with ciprofloxacin (concentration changed from 0 to  $4 \times 10^{-4}$  M).

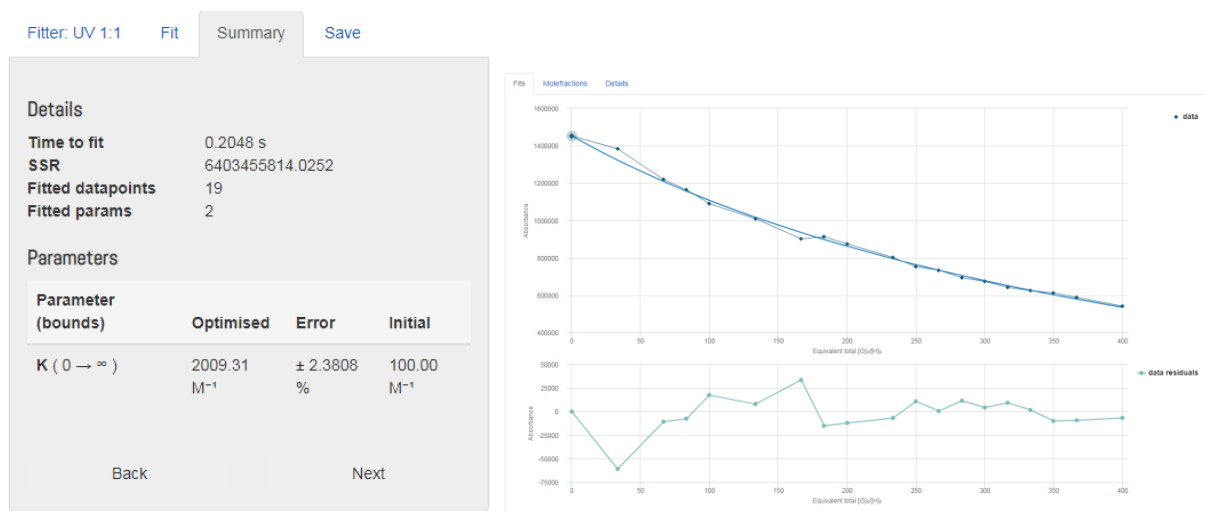

**Figure S76.** Bindfit (Fit data to 1:1 Host-Guest equilibria). Screenshots taken from the summary window of the website supramolecular.org. This screenshot shows the raw data for fluorescence titration of **4**/BSA (1:10) with ciprofloxacin, the data fitted to 1:1 binding model.

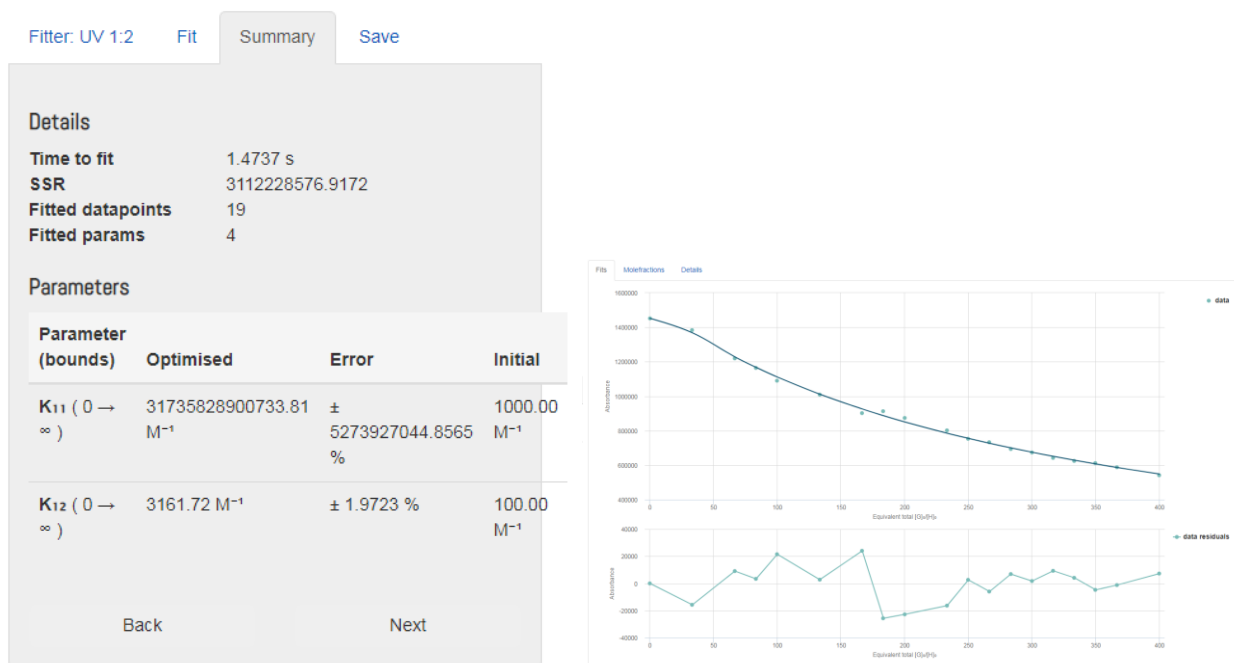

**Figure S77.** Bindfit (Fit data to 1:2 Host-Guest equilibria). Screenshots taken from the summary window of the website [supramolecular.org](http://supramolecular.org). This screenshots shows the raw data for fluorescence titration of **4**/BSA (1:10) with ciprofloxacin, the data fitted to 1:2 binding model.

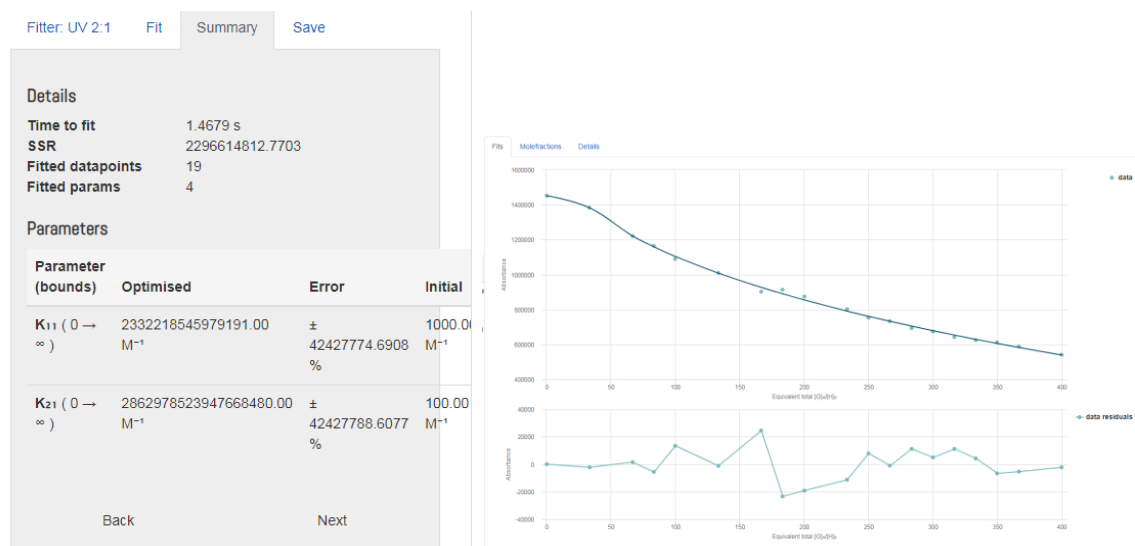

**Figure S78.** Bindfit (Fit data to 2:1 Host-Guest equilibria). Screenshots taken from the summary window of the website [supramolecular.org](http://supramolecular.org). This screenshots shows the raw data for fluorescence titration of **4**/BSA (1:10) with ciprofloxacin, the data fitted to 2:1 binding model.



## 5. Tables

**Table S1.** Size of aggregates are formed during association of compounds **3** and **4** in phosphate buffer in the presence / absence of BSA (macrocycle/BSA 1:1).

| System       | C, M                                | D1, nm / S, %        | D2, nm / S, %  | D3, nm / S, % | PDI       |
|--------------|-------------------------------------|----------------------|----------------|---------------|-----------|
| BSA          | $5 \times 10^{-5}$                  | <b>7.0±0.07, 99%</b> | 1521±2358, 1%  |               | 0.13±0.03 |
| BSA          | $1 \times 10^{-5}$                  | <b>7.1±0.14, 97%</b> | 3324±1883, 3%  |               | 0.17±0.05 |
| BSA          | $5 \times 10^{-6}$                  | <b>6.9±0.16, 92%</b> | 2712±1904, 7%  | 1864±2553, 1% | 0.25±0.04 |
| BSA          | $1 \times 10^{-6}$                  | 7.0±0.43, 80%        | 1885±2217, 14% | 3357±2287, 6% | 0.18±0.04 |
| <b>3</b>     | $5 \times 10^{-5}$                  | 271±37, 92%          | 1136±2473, 6%  | 1098±2451, 2% | 0.49±0.08 |
| <b>3</b>     | $1 \times 10^{-5}$                  | 343±4, 86%           | 3421±2937, 10% | 1797±3099, 4% | 0.45±0.06 |
| <b>3</b>     | $5 \times 10^{-6}$                  | 170±6, 94%           | 3212±2933, 6%  |               | 0.53±0.05 |
| <b>3</b>     | $1 \times 10^{-6}$                  | 325±27, 99%          | 2224±3045, 1%  |               | 0.56±0.09 |
| <b>4</b>     | $5 \times 10^{-5}$                  | 208±16, 95%          | 3352±2566, 4%  | 1685±2597, 1% | 0.32±0.03 |
| <b>4</b>     | $1 \times 10^{-5}$                  | 186±18, 100%         |                |               | 0.30±0.09 |
| <b>4</b>     | $5 \times 10^{-6}$                  | 187±20, 99%          | 2202±3016, 1%  |               | 0.27±0.06 |
| <b>4</b>     | $1 \times 10^{-6}$                  | 180±25, 93%          | 2344±2706, 7%  |               | 0.54±0.16 |
| <b>3/BSA</b> | $5 \times 10^{-5}/5 \times 10^{-5}$ | <b>7.2±0.15, 98%</b> | 3748±1655, 2%  |               | 0.15±0.02 |
| <b>3/BSA</b> | $1 \times 10^{-5}/1 \times 10^{-5}$ | <b>7.0±0.22, 94%</b> | 3386±1533, 4%  | 1184±2054, 2% | 0.22±0.04 |
| <b>3/BSA</b> | $5 \times 10^{-6}/5 \times 10^{-6}$ | <b>7.1±0.11, 89%</b> | 1157±238, 10%  | 2185±2552, 1% | 0.26±0.02 |
| <b>3/BSA</b> | $1 \times 10^{-6}/1 \times 10^{-6}$ | 6.8±0.21, 81%        | 462±266, 14%   | 4607±436, 5%  | 0.26±0.05 |
| <b>4/BSA</b> | $5 \times 10^{-5}/5 \times 10^{-5}$ | <b>6.8±0.05, 76%</b> | 281±14, 24%    |               | 0.38±0.01 |
| <b>4/BSA</b> | $1 \times 10^{-5}/1 \times 10^{-5}$ | <b>7.0±0.13, 72%</b> | 308±32, 25%    | 3692±2095, 3% | 0.43±0.03 |
| <b>4/BSA</b> | $5 \times 10^{-6}/5 \times 10^{-6}$ | <b>7.0±0.02, 80%</b> | 300±12, 20%    |               | 0.35±0.02 |
| <b>4/BSA</b> | $1 \times 10^{-6}/1 \times 10^{-6}$ | <b>6.9±0.10, 72%</b> | 264±42, 24%    | 4592±2402, 4% | 0.28±0.10 |

**Table S2.** Size of aggregates are formed during association of compounds **3** and **4** in phosphate buffer in the presence / absence of BSA (macrocycle/BSA 1:10).

| System | C, M               | D1, nm / S, %        | D2, nm / S, % | D3, nm / S, % | PDI       |
|--------|--------------------|----------------------|---------------|---------------|-----------|
| BSA    | $5 \times 10^{-4}$ | <b>6.2±0.09, 93%</b> | 3391±926, 7%  |               | 0.22±0.02 |
| BSA    | $1 \times 10^{-4}$ | <b>6.9±0.04, 99%</b> | 1887±2585, 1% |               | 0.14±0.02 |
| BSA    | $5 \times 10^{-5}$ | <b>7.0±0.07, 99%</b> | 1521±2358, 1% |               | 0.13±0.03 |

|              |                                     |                       |                |               |           |
|--------------|-------------------------------------|-----------------------|----------------|---------------|-----------|
| BSA          | $1 \times 10^{-5}$                  | <b>7.1±0.14, 97%</b>  | 3324±1883, 3%  |               | 0.17±0.05 |
| BSA          | $5 \times 10^{-6}$                  | <b>6.9±0.16, 92%</b>  | 2712±1904, 7%  | 1864±2553, 1% | 0.25±0.04 |
| BSA          | $1 \times 10^{-6}$                  | 7.0±0.43, 80%         | 1885±2217, 14% | 3357±2287, 6% | 0.18±0.04 |
| <b>3</b>     | $5 \times 10^{-5}$                  | 271±37, 92%           | 1136±2473, 6%  | 1098±2451, 2% | 0.49±0.08 |
| <b>3</b>     | $1 \times 10^{-5}$                  | 343±4, 86%            | 3421±2937, 10% | 1797±3099, 4% | 0.45±0.06 |
| <b>3</b>     | $5 \times 10^{-6}$                  | 170±6, 94%            | 3212±2933, 6%  |               | 0.53±0.05 |
| <b>3</b>     | $1 \times 10^{-6}$                  | 325±27, 99%           | 2224±3045, 1%  |               | 0.56±0.09 |
| <b>4</b>     | $5 \times 10^{-5}$                  | 208±16, 95%           | 3352±2566, 4%  | 1685±2597, 1% | 0.32±0.03 |
| <b>4</b>     | $1 \times 10^{-5}$                  | 186±18, 100%          |                |               | 0.30±0.09 |
| <b>4</b>     | $5 \times 10^{-6}$                  | 187±20, 99%           | 2202±3016, 1%  |               | 0.27±0.06 |
| <b>4</b>     | $1 \times 10^{-6}$                  | 180±25, 93%           | 2344±2706, 7%  |               | 0.54±0.16 |
| <b>3/BSA</b> | $5 \times 10^{-5}/5 \times 10^{-4}$ | <b>6.0±0.03, 75%</b>  | 623±100, 23%   | 2334±2695, 2% | 0.38±0.01 |
| <b>3/BSA</b> | $1 \times 10^{-5}/1 \times 10^{-4}$ | <b>6.6±0.06, 84%</b>  | 710±95, 16%    |               | 0.31±0.02 |
| <b>3/BSA</b> | $5 \times 10^{-6}/5 \times 10^{-5}$ | <b>6.6±0.16, 83%±</b> | 612±140, 16%   | 1981±2714, 1% | 0.30±0.03 |
| <b>3/BSA</b> | $1 \times 10^{-6}/1 \times 10^{-5}$ | <b>6.8±0.05, 85%±</b> | 667±94, 14%    | 2305±2662     | 0.30±0.01 |
| <b>4/BSA</b> | $5 \times 10^{-5}/5 \times 10^{-4}$ | <b>6.1±0.14, 93%</b>  | 2661±1274, 6%  | 1159±1975     | 0.22±0.03 |
| <b>4/BSA</b> | $1 \times 10^{-5}/1 \times 10^{-4}$ | <b>7.0±0.07, 99%</b>  | 2856±2216, 1%  |               | 0.15±0.02 |
| <b>4/BSA</b> | $5 \times 10^{-6}/5 \times 10^{-5}$ | <b>7.2±0.07, 99%</b>  | 3640±1784, 1%  |               | 0.15±0.01 |
| <b>4/BSA</b> | $1 \times 10^{-6}/1 \times 10^{-5}$ | <b>7.1±0.10, 91%</b>  | 1652±759, 8%   | 1417±2196, 1% | 0.25±0.03 |
